1                   **Resource sharing by outer membrane vesicles from a citrus pathogen**

2

3 Gabriel G. Araujo<sup>1</sup>, Matheus M. Conforte<sup>1</sup>, Aline D. da Purificação<sup>1</sup>, Iris Todeschini<sup>1</sup>, Edgar E.  
4 Llontop<sup>2</sup>, Claudia B. Angeli<sup>3</sup>, Alex Inague<sup>2</sup>, Marcos Y. Yoshinaga<sup>2</sup>, Robson F. de Souza<sup>1</sup>,  
5 Rodrigo Papai<sup>4</sup>, Maciel S. Luz<sup>4</sup>, Sayuri Miyamoto<sup>2</sup>, Giuseppe Palmisano<sup>3</sup>, Chuck S. Farah<sup>2</sup>,  
6 Cristiane R. Guzzo<sup>1#</sup>

7

8 <sup>1</sup> Department of Microbiology, Institute of Biomedical Sciences, University of São Paulo, Ave.  
9 Prof. Lineu Prestes, 1374, Cidade Universitária, 05508-000, São Paulo, SP, Brazil.

10 <sup>2</sup> Department of Biochemistry, Institute of Chemistry, University of São Paulo, Ave. Prof. Lineu  
11 Prestes, 748, Cidade Universitária, 05508-000, São Paulo, SP, Brazil.

12 <sup>3</sup> Department of Parasitology, Institute of Biomedical Sciences, University of São Paulo, Ave.  
13 Prof. Lineu Prestes, 1374, Cidade Universitária, 05508-900, São Paulo, SP, Brazil.

14 <sup>4</sup> Laboratório de Processos Metalúrgicos, Instituto de Pesquisas Tecnológicas do Estado de São  
15 Paulo (IPT), Ave. Prof. Almeida Prado, 532, Cidade Universitária, 05508-901, São Paulo, SP,  
16 Brazil.

17 # To whom correspondence should be addressed: Prof. Cristiane Guzzo Carvalho, Department of  
18 Microbiology, Institute of Biomedical Sciences, University of São Paulo, Ave. Prof. Lineu  
19 Prestes, 1374, Cidade Universitária, 05508-000, São Paulo, SP, Brazil, phone: +55 11 3091-  
20 7298; email: [crisguzzo@usp.br](mailto:crisguzzo@usp.br) and [crisguzzo@gmail.com](mailto:crisguzzo@gmail.com).

21

22 **Running title: Resource sharing by OMVs**

23

## 24 **Abstract**

25           The causative agent of citrus canker disease, *Xanthomonas citri* pv. *citri*, was found to  
26 produce copious amounts of outer membrane vesicles (OMVs), frequently forming long  
27 membranous tubes under different culture conditions. Lipidomic analysis revealed significant  
28 differences in lipid composition between purified vesicles in relation to whole cells. The results  
29 suggest an enrichment in saturated cardiolipins and a decrease in unsaturated lipids in the OMV  
30 samples, possibly granting them a more rigid structure while allowing their high degree of  
31 curvature caused by their small diameters. The vesicles' proteome was found to be significantly  
32 enriched in TonB-dependent receptors related to the acquisition of different nutrients. These  
33 proteins are known to transport siderophores, which were evidenced to be present in purified *X.*  
34 *citri* OMVs, along with essential metals including iron, zinc, and manganese quantified by  
35 elemental analysis. The availability of vesicle-associated nutrients to be incorporated by cells  
36 was demonstrated by the use of OMVs as the sole carbon source for bacterial growth. At last, the  
37 vesicles also presented esterase and protease activities, which have been associated with  
38 virulence in phytopathogens. These evidences point that *X. citri* cells can use OMVs to share  
39 resources within microbial communities, which has potential implications for microbial  
40 interactions and plant colonization, affecting their survival and persistence on the host and in the  
41 environment.

42

## 43 **Importance**

44           The shedding of outer membrane vesicles appears to be universal in Gram-negative  
45 bacteria and effectively constitutes a unique secretion pathway for diverse molecules and  
46 proteins. To study their possible functions in the citrus pathogen *Xanthomonas citri*, purified

47 vesicles from this bacterium were studied by omics and functional approaches. Nutrient  
48 transporters were found associated to these structures, which were evidenced to contain  
49 siderophores and essential metals. The availability of these nutrients to be incorporated by cells  
50 was then demonstrated by showing that purified vesicles can be used as sole carbon sources for  
51 microbial growth. Additionally, the samples also presented esterase and protease activities which  
52 can contribute to the release of substrates from plant host tissues. These observations help to  
53 establish the developing idea of vesicles as shared bacterial resources which can participate in  
54 shaping host-associated microbial communities in contrast to other interactions such as bacterial  
55 competition.

56

## 57 **Introduction**

58 The production of outer membrane vesicles (OMVs) is known to be extremely common  
59 to Gram-negative bacteria and has been specially explored in pathogens due to their association  
60 to virulence factors (Schwechheimer and Kuehn, 2015; Toyofuku et al., 2019). Less commonly  
61 described structures are outer membrane tubes, also named tube-shaped membranous structures,  
62 nanotubes, nanowires and nanopods in different organisms. The tubes are considered to be a  
63 specialized form of OMVs, which assemble in the form of chains or completely fused to one  
64 another (Pirbadian et al., 2014; Remis et al., 2014; Pirbadian et al., 2015; Fischer et al., 2019;  
65 Toyofuku et al., 2019). These tubes seem to have the potential to bridge cell surfaces at long  
66 ranges, but their exact function, if at all dependent on their elongated shape, is still unclear on  
67 most cases and varies between different organisms.

68 *Myxococcus xanthus* outer membrane tubes are some of the most studied of these  
69 structures, forming a widespread network between the cells within biofilms that were proposed

70 to promote coordination for these bacteria’s notorious social behaviors by serving as a transport  
71 medium for proteins and other molecules (Remis et al., 2014). Nevertheless, simply the presence  
72 of the tubes may not be sufficient for such activities since specific factors were found to be  
73 necessary to allow effective molecular exchanges through outer membrane connections. Namely,  
74 the proteins TraA and TraB were identified by genetic screening to be required for transferring  
75 outer membrane proteins by direct contacts between cells, while not affecting the production of  
76 tubes (Dey and Wall, 2014; Cao and Wall, 2019). In the zoonotic pathogen *Francisella novicida*  
77 which causes tularemia disease, virulence factors were detected in its OMVs and outer  
78 membrane tubes, which interestingly always appear to be of a continuous, non-segmented type.  
79 Interaction with host cells led to increased expression of the tubes, suggesting a role of these  
80 structures in the infection process (McCaig et al., 2013; Sampath et al., 2018). In *Vibrio*  
81 *vulnificus*, OMVs carry the virulence factor cytolysin–hemolysin VvhA (Kim et al., 2010), while  
82 its segmented tubes seem to exist only transiently as intermediates within the capsule of this  
83 opportunistic pathogen (Hampton et al., 2017). Somewhat in contrast to these examples, the  
84 outer membrane tubes of *Shewanella oneidensis* seem play a much clearer role in the biology of  
85 this organism. These membranous extensions form “nanowires” from which components of the  
86 electron transport chain of this metal-reducing bacterium can reach extracellular mineral electron  
87 acceptors (Pirbadian et al., 2014, 2015).

88 Studies with other environmental bacteria also revealed other possible implications of  
89 these structures on cell metabolism. In a marine *Flavobacterium* sp., OMV chains were proposed  
90 to serve as an extension of the cell surface for the degradation and incorporation of substrates  
91 (Fischer et al., 2019). OMVs of polycyclic aromatic hydrocarbon-degrading *Delftia* sp. Cs1-4  
92 were found to be contained within tubular “nanopods” surrounded by a surface layer protein,

93 NpdA, the production of which was stimulated by growth on phenanthrene. The presence of  
94 NpdA and the formation of an encasing structure for OMV tubes seem to be a characteristic  
95 distributed within the *Comamonadaceae* family (Shetty et al., 2011).

96         The examples presented above represent some of the exploration done on the relatively  
97 few, but nonetheless diverse bacteria identified that assemble extracellular tubular-shaped  
98 structures from their outer membrane. Nevertheless, OMVs are most commonly found not as  
99 chains but as free entities, which are produced by Gram-negative bacteria in different  
100 environments, such as biofilms, planktonic cultures, and within hosts (Hellman et al., 2000;  
101 Biller et al., 2014; Hickey et al., 2015). More generally speaking, extracellular membrane  
102 vesicles are also commonly produced by Gram-positive bacteria, archaea, and by eukaryotic cells  
103 (Schwechheimer and Kuehn, 2015).

104         Due to them being an effective way for microbial cells to release the most diverse  
105 compounds, OMV production can be used as a secretion mechanism and thus have been called  
106 the “type zero secretion system” (Schwechheimer and Kuehn, 2015; Guerrero-Mandujano et al.,  
107 2017; Toyofuku et al., 2019). Differently from other bacterial secretion systems, OMVs require a  
108 remodeling of the Gram-negative envelope to release vesicles made of outer membrane  
109 constituents with a periplasmic lumen. Therefore, different bacterial envelope crosslinks and  
110 non-covalent interactions between proteins located in the membrane that interact with the cell  
111 wall must be broken during the secretion of OMVs (Schwechheimer and Kuehn, 2015). Details  
112 of this process are still unclear, as well as if there is any generalized protein system actively  
113 involved in OMV biogenesis. Another process that is still not well understood is cargo selection,  
114 if proteins and chemical compounds can be directed into OMVs by the cell and secreted to the  
115 extracellular medium (Lappann et al., 2013; Elhenawy et al., 2014). In some bacteria, OMV

116 synthesis can be triggered under stress conditions, such as antibiotic treatments that activate SOS  
117 response and under oxidative stress (McBroom and Kuehn, 2007; Maredia et al., 2012;  
118 Macdonald and Kuehn, 2013; Schwechheimer and Kuehn, 2013). Under these situations, OMVs  
119 may serve as a way to remove potentially harmful compounds, such as misfolded proteins.

120         OMVs may promote the acquisition of nutrients and essential ions such as iron and zinc  
121 in bacterial communities and during host colonization (Evans et al., 2012; Toledo et al., 2012;  
122 Biller et al., 2014; Schwechheimer and Kuehn, 2015). The role of OMVs in nutrition has been  
123 suggested for different bacteria, such as *M. xanthus*, the cyanobacterium *Prochlorococcus* sp.,  
124 *Borrelia burgdorferi*, *Neisseria meningitidis*, *Porphyromonas gingivalis*, *Moraxella catarrhalis*,  
125 and for cytoplasmic membrane vesicles of *Mycobacterium tuberculosis* (Aebi et al., 1996; Evans  
126 et al., 2012; Toledo et al., 2012; Lappann et al., 2013; Biller et al., 2014). It is not clear if OMVs  
127 have a universal role for nutrient acquisition, but in some cases they have been suggested to act  
128 as public goods that benefit the producer cells as well as other bacteria from the community that  
129 can absorb them or use the products released by the action of enzymes located in the OMVs  
130 (Evans et al., 2012; Elhenawy et al., 2014; Schwechheimer and Kuehn, 2015). An example is the  
131 relationship between bacteria found in the gut microbiota. OMVs produced by *Bacteroides*  
132 species carry hydrolases and polysaccharide lyases which can be used by bacteria that do not  
133 produce these enzymes to metabolize polysaccharides as nutrient sources in a mutualistic  
134 interaction (Rakoff-Nahoum et al., 2014).

135         Few studies have focused in the OMVs of phytopathogens. Still, research on this topic  
136 has revealed that, similarly to their animal-colonizing counterparts, bacteria that inflict diseases  
137 on plants were found to produce vesicles loaded with virulence-associated proteins and are  
138 capable of inducing immune responses on their hosts (Sidhu et al., 2008; Solé et al., 2015; Bahar

139 et al., 2016; Nascimento et al., 2016; Katsir and Bahar, 2017; Feitosa-Junior et al., 2019). These  
140 observations include *Xanthomonas* species and the closely related plant pathogen *Xylella*  
141 *fastidiosa*.

142 Strains from the genus *Xanthomonas*, known to cause diseases in a number of plant hosts,  
143 frequently contain most of the traditional bacterial macromolecular secretion systems named  
144 type I to VI (Büttner and Bonas, 2010; Alvarez-Martinez et al., 2021). OMVs, however, are  
145 comparatively much less studied than these other systems in these bacteria. Thus, this work  
146 focuses on unveiling the composition and possible roles of vesicles from one such  
147 phytopathogen, the causative agent of citrus canker disease, *Xanthomonas citri* pv. *citri* strain  
148 306 (*X. citri*). Long extracellular appendages composed of OMVs were identified under different  
149 culture conditions, and the purified OMVs were investigated by elemental analysis, proteomic  
150 and lipidomic techniques, as well as by functional approaches. The vesicles were found to be  
151 potential vehicles of nutrients and essential ions available for incorporation by bacterial cells.  
152 This function, in association with the esterase and protease activities observed in the purified *X.*  
153 *citri* OMVs, may possibly aid in the microbial colonization of the plant host and contribute to  
154 disease establishment.

155

## 156 **Results and Discussion**

### 157 Visualization of *X. citri* outer membrane vesicles and tubes by negative stain TEM

158 Negative stain transmission electron microscopy (TEM) revealed the presence of tubular  
159 extensions from *X. citri* cells grown in plates of different culture media, identified as outer  
160 membrane tubes (**Fig. 1**). Upon closer inspection, the tubes were found to be formed from  
161 vesicle chains, occasionally with a well-defined segmentation but frequently presenting nearly

162 indistinguishable boundaries between links, seeming almost continuous. The size of the tubes  
163 ranged from short segments up to a few micrometers in length. Surrounding the cells in all  
164 conditions tested, a multitude of outer membrane vesicles (OMVs) was also present (**Fig. 1**). For  
165 most of their extension, the tubes appear to be composed of vesicles with a more homogeneous  
166 diameter (58-74 nm) than the isolated OMVs. Each tube seem to possess larger vesicles at its tips  
167 (88-103 nm), and some longer tubes appear to be formed by segments connected by these larger  
168 subunits.

169         Amongst the different culture media tested, Silva–Buddenhagen (SB) plates (Ou, 1985)  
170 seemingly produced the largest amount of tubes and vesicles, and thus were used for further  
171 experiments. The agar percentage (0.6 – 1.5%) seemed to not significantly affect the production  
172 of tubes, but these structures seemed to be rarer when the cells were grown in liquid medium  
173 (**Fig. S1**).

174         *Purification of outer membrane vesicles combined with lipidomics and proteomics*  
175 *analyses*

176         Pure, cell-free, OMVs could be purified from cultures grown in SB plates by filtration  
177 and density gradient centrifugation generating a clear yellow suspension (**Fig. 2A**). The tubes did  
178 not appear in the final preparations, being either lost during the process or disassembling from  
179 the manipulation (**Fig. 2B**). The purity of the OMV preparations was confirmed by negative stain  
180 TEM and absence of growth from contaminating cells. In addition to that, dynamic light  
181 scattering (DLS) was employed to measure their diameter distribution. The vesicles were  
182 determined to be monodispersed, with sizes ranging from about 40 to 150 nm, with a peak at  
183 around 75 nm (**Fig. 2C**), well within previous descriptions for OMVs (Schwechheimer and



184 Kuehn, 2015). The purified samples were then subjected to different analytical procedures to  
185 reveal their molecular composition.

186 Lipidomic analysis by liquid chromatography-tandem mass spectrometry (LC-MS/MS) of  
187 pure OMVs, partially purified OMV preparations (“OMV-enriched” samples, in which the cells  
188 were removed by filtration but not submitted to the density gradient centrifugation step), and  
189 whole *X. citri* cells revealed substantial differences between the samples. Sixty-six different  
190 lipids were identified, divided into 6 subclasses: cardiolipins (CL), free fatty acids (FFA),  
191 phosphatidylcholine (PC), phosphatidylethanolamine (PE), phosphatidylglycerol (PG), and  
192 methylated-phosphatidylserine (PS-Me) (**Fig. 3A**). CL, a type of diphosphatidylglycerol lipid,  
193 was the most diverse and abundant lipid subclass in all samples (**Fig. 3B**). The main difference  
194 observed was that, in relation to whole cells, pure OMVs appeared to be enriched in CL and  
195 relatively impoverished in PG (the biosynthetic precursor of CL). Free fatty acids were highly  
196 prevalent, likely reflecting their important role as common metabolic intermediates. It is  
197 important to note that the main components of the outer leaflet of bacterial outer membranes,  
198 lipopolysaccharides (LPS), were not evaluated in this analysis due to their relatively hydrophilic  
199 nature, making them too polar to be extracted along the other lipids.

200 A volcano plot analysis revealed 20 altered lipids between OMV-containing and whole  
201 cell samples, all presenting significant ( $p < 0.05$  ; FDR-adjusted t-test) fold changes values above  
202 1.5 (**Fig. S2**). In the heatmap distribution for these altered lipids, according to one-way ANOVA,  
203 each sample type clustered with its replicates, with the OMVs (partially or completely purified)  
204 grouping separately from whole cells (**Fig. 3C**). Interestingly, it could be observed that the  
205 OMVs had relatively increased amounts of several CL species linked to saturated fatty acids and

206 decreased quantities of phospholipids (including CL) linked to unsaturated fatty acids when  
207 compared to the whole cells.

208 The cone-shaped lipid CL is known to localize to negative curvature regions on  
209 membranes (Renner and Weibel, 2011; Beltran-Heredia et al., 2019), such as in the inner leaflet  
210 of *X. citri* OMVs, which present small diameters and are thus highly curved structures.  
211 Additionally, the relatively higher saturation of the CL-linked chains in the vesicles may grant  
212 the OMVs with more membrane rigidity (Tashiro et al., 2011). CL has been described as  
213 organizing into microdomains where CL-interacting proteins localize (Sorice et al., 2009;  
214 Planas-Iglesias et al., 2015; Lin and Weibel, 2016). In this manner, protein affinity for these  
215 lipids could contribute cargo sorting into *X. citri* OMVs.

216 Nanoflow liquid chromatography-tandem mass spectrometry (nLC-MS/MS) was used for  
217 the proteomic analysis of two replicates of purified OMV suspensions using in-solution  
218 digestion. Parallel to that, four bands of OMV proteins separated in a SDS-PAGE gel were used  
219 for a gel electrophoresis liquid chromatography (GeLC) approach using in-gel digestion (**Fig.**  
220 **4A**). The data from the gel band samples were pooled and quantitatively compared to the two  
221 replicates of the in-solution digestion. A total of 698 proteins were identified with at least one  
222 peptide, with 561 proteins presenting two or more peptides (**Data Set S1** and **Data Set S2**).  
223 Using their iBAQ (intensity based absolute quantification) values, the top 100 most abundant  
224 proteins from each sample were selected and compared (**Fig. 4B**). While the in-solution  
225 duplicates presented a large overlap, sharing 86 of their top 100 proteins, the GeLC approach  
226 (gel bands samples) revealed the most distinct profile, with 49 of their most abundant proteins  
227 being unique to its set.

228           The grouping of the top 100 non-redundant proteins with the highest iBAQ values for  
229 each sample yielded a list of 163 different proteins (**Table S1**). Subcellular localization  
230 prediction with PSORTb, manually curated based on sequence annotations, pointed out that  
231 42.3% of these sequences are expected to be outer membrane proteins and 12.3% are likely  
232 periplasmic (**Fig. 5A**). The presence of inner membrane and cytoplasmic components observed  
233 in the proteome of *X. citri* OMVs, including ribosomal proteins, is commonly reported in the  
234 literature but remains unexplained as to how these proteins might associate to OMVs  
235 (Schwechheimer and Kuehn, 2015; Sjöström et al., 2015; Toyofuku et al., 2019; Zwarycz et al.,  
236 2020). Additionally, a cellular location could not be predicted for 21.5% of the identified  
237 proteins. For a different view on protein localization, SignalP was used to predict the secretion  
238 mechanisms of the OMV proteins (**Fig. 5B**). Nearly half of them (49.7%) contained signal  
239 peptides and almost one-fifth (19%) were predicted lipoproteins. A large “other” category  
240 (29.4%) includes cytoplasmic components and other proteins with non-classical or unknown  
241 secretion mechanisms.

242           From a functional perspective, proteins containing a TonB-dependent receptor domain  
243 were the most significantly enriched in the vesicles in comparison to the *X. citri* pv. *citri* 306  
244 genome (**Fig. 5C**), as determined for Pfam annotations by the statistical enrichment analysis  
245 function of the STRING database (Franceschini et al., 2013). In accordance with that, the  
246 STRING analysis also identified a number of InterPro domains related to TonB-dependent  
247 receptors as the most significantly enriched in the samples (**Fig. S3**). In total, of the 163 most  
248 abundant proteins (**Table S1**), 31 were found to contain a “TonB-dependent receptor” Pfam  
249 domain (PF00593), the same set which contained a “TonB-dependent receptor-like, beta-barrel”  
250 InterPro domain (IPR000531). In a previous report, TonB-dependent receptors were found to

251 compose the majority of the identified outer membrane proteins in OMVs from *Xanthomonas*  
252 *campestris* pv. *campestris* (Sidhu et al., 2008). These outer membrane receptors are known to  
253 transport a range of nutrients, including metal-binding compounds (particularly siderophores),  
254 nickel complexes, vitamin B<sub>12</sub>, and carbohydrates (Blanvillain et al., 2007; Krewulak and Vogel,  
255 2011). Based on sequence annotations, the OMV proteome presents different types of TonB-  
256 dependent receptors which may bind diverse substrates (**Table S1**). These proteins are expected  
257 to remain able to bind to their specific ligands in the surface of the OMVs, though their  
258 internalization should not occur under these conditions since inner membrane components of this  
259 transport system are necessary to power substrate translocation (Krewulak and Vogel, 2011).

#### 260 *OMVs as sources of nutrients and essential metals*

261 Based on similar observations in relation to ion transporters in their proteomes, OMVs  
262 from different bacterial species have been suggested to be involved in metal acquisition  
263 (Schwechheimer and Kuehn, 2015). Given this abundance of TonB-dependent receptors in the *X.*  
264 *citri* OMVs, mainly associated with siderophore transport, chrome azurol S (CAS) agar plates  
265 (Schwyn and Neilands, 1987) were used as a qualitative assay to evidence the presence of this  
266 type of molecule associated with the purified vesicles. OMV suspensions added to the medium  
267 caused its discoloration, indicating the displacement of the iron in the blue-colored CAS complex  
268 by the putative high affinity siderophores present in the samples (**Fig. 6A**). It is interesting to  
269 note that the iron-scavenging role of siderophores for microbial growth can also be important in  
270 phytopathogens for interactions with the host plant, promoting virulence and potentially  
271 triggering immune responses (Aznar and Dellagi, 2015).

272 To further investigate the association of the OMVs with essential metals, their elemental  
273 composition was determined by triple quadrupole inductively coupled plasma-mass spectrometry

274 (TQ ICP-MS) (**Fig. 6B**). **Table S2** presents the full results for all tested elements (C, Mg, S, Ca,  
275 Mn, Fe, Co, Ni, Cu, Zn, Br, Se, I, and Ba). The relative concentration of the elements in relation  
276 to carbon, reported as element-to-carbon ratios, was used as a comparative abundance value of  
277 the chemical elements in OMVs. The analysis confirmed the presence iron in the OMVs  
278 ( $899\pm 450$  ppb in relation to carbon), concurrent with the observed occurrence of receptors for  
279 iron-binding molecules in the vesicles and evidence for the presence of siderophores in the  
280 samples. Yet, iron was found at a smaller concentration than calcium ( $229\pm 54$  ppm) and  
281 magnesium ( $58\pm 5$  ppm), which are probably mostly bound to the LPS layer on the vesicles'  
282 surface (Coughlin et al., 1983), thus explaining their relative abundance. Zinc ( $9\pm 5$  ppm) was  
283 another biologically important metal ion determined at substantial levels in the OMVs. It can be  
284 used as a cofactor for different enzymes, including for metallopeptidases known to contribute to  
285 the pathogenicity of some organisms (Hase and Finkelstein, 1993). In fact, a few such zinc-  
286 dependent metallopeptidases were identified in the OMVs (**Data Set S1** and **Data Set S2**),  
287 though their specific biological roles have not yet been defined. In addition to that, manganese  
288 ( $450\pm 45$  ppb) can also act as a cofactor in a number of different enzymes and was also quantified  
289 in the samples. At last, cobalt ( $12\pm 5$  ppb) was detected in the vesicles. This is interesting given  
290 that among the TonB-dependent receptors enriched in the OMVs (**Table S1**), at least one is  
291 annotated as specific for vitamin B<sub>12</sub>, a molecule which contains a coordinated cobalt ion. This  
292 protein, XAC3194, specifically contains a “TonB-dependent vitamin B<sub>12</sub> transporter BtuB”  
293 InterPro Domain (IPR010101).

294 To test if the vesicles and the material associated to them are accessible to *X. citri* cells  
295 and can be utilized by them as nutrient sources, purified OMVs were tested as the sole carbon  
296 source for microbial growth. Substantial growth was observed for the samples where OMVs

297 were added, with the highest vesicle protein concentration tested leading to a multiplication of  
298 about 1000-fold in colony-forming units (**Fig. 6C**), indicating that the macromolecules  
299 associated with the vesicles were being consumed by the bacteria. This confirms the ability of  
300 these structures and the material they carry to be incorporated and used by cells, strengthening  
301 the hypothesis that they can act as nutrient vehicles such as has been proposed for other bacteria  
302 (Aebi et al., 1996; Evans et al., 2012; Toledo et al., 2012; Lappann et al., 2013; Biller et al.,  
303 2014; Schwechheimer and Kuehn, 2015). The mechanism for this incorporation, however,  
304 remains unclear. It could be mediated by the degradation of the vesicles for the release of their  
305 contents in some manner, but fusion of the OMVs to the cells' surfaces can also possibly be  
306 considered (Evans et al., 2012).

#### 307 Esterase and protease activity of OMVs

308 Additional functional assays with the purified *X. citri* OMVs revealed they present  
309 esterase activity. Qualitative assays on agar plates evidenced their capacity to cause the  
310 hydrolysis of the triglyceride tributyrin emulsified in the medium, generating a clear halo (**Fig.**  
311 **7A**), as well as to release the fatty acids from molecules of Tween 20, leading to their  
312 precipitation with the calcium added to the plates (**Fig. 7B**). Further assays were performed in  
313 suspension with *p*-nitrophenyl butyrate (*p*NP-C4) and *p*-nitrophenyl octanoate (*p*NP-C8) as  
314 chromogenic substrates, adding controlled amounts of vesicles quantified by their protein  
315 content. Using *p*NP-C4, a clear trend could be observed of increasing OMV protein  
316 concentration leading to faster product release (**Fig. 7C**). The longer chain substrate *p*NP-C8 was  
317 also hydrolyzed, but there were no clear differences between the different quantities of added  
318 vesicles (**Fig. 7D**). This is probably due to the low solubility of *p*NP-C8 in the medium, thus  
319 becoming the limiting factor for the reaction. Nonetheless, with both *p*-nitrophenyl esters, a

320 plateau seems to have been reached during the incubation with the OMVs, suggesting all the  
321 available substrate was consumed.

322         The esterase activity associated with the OMVs measured for a broad range of substrates  
323 can possibly be attributed to the outer membrane esterase with an autotransporter domain  
324 XAC3300 (gene name *estA*) identified among the most abundant proteins in the proteome,  
325 though other undetected enzymes may be present. Esterases have been reported to contribute to  
326 the virulence of phytopathogens, playing roles such as aiding in the degradation of cutin, pectin,  
327 or xylan in plant host tissues (Fett et al., 1992; Aparna et al., 2009; Tamir-Ariel et al., 2012;  
328 Dejean et al., 2013; Nascimento et al., 2016; Tayi et al., 2016; Ueda et al., 2018), depending on  
329 their substrate preference. In *Xanthomonas oryzae* pv. *oryzae*, loss of function of the LipA  
330 esterase lead to loss of virulence on rice and to the inability to induce host defense responses  
331 (Aparna et al., 2009), while a LipA mutant of *Xanthomonas campestris* pv. *vesicatoria* induced  
332 less severe symptoms on tomato than the wild type (Tamir-Ariel et al., 2012). The LipA ortholog  
333 of the related plant pathogen *Xylella fastidiosa*, LesA, was found to be present in OMVs. This  
334 esterase was able to induce hypersensitive response-like symptoms in grapevine leaves, while a  
335 LesA mutant showed decreased virulence (Nascimento et al., 2016). At last, a LipA mutant of *X.*  
336 *citri* presented reduced symptoms when inoculated into citrus leaves (Assis et al., 2017). This  
337 particular protein (XAC0501), however, could not be identified in the *X. citri* OMV proteome  
338 (**Data Set S1** and **Data Set S2**) but other esterases could perform similar functions in the plant  
339 host.

340         Proteases are another class of hydrolases that have been associated to pathogenesis in  
341 plant-infecting microorganisms (Hou et al., 2018; Figaj et al., 2019). In the *X. citri* OMV  
342 samples, this enzymatic activity was identified utilizing a fluorescent casein substrate (**Fig. 8**),

343 revealing yet another function connected to these structures. More substrate degradation was  
344 observed with the addition of increasing amounts of OMVs to the reactions, while a commercial  
345 EDTA-free protease inhibitor mix was able to substantially reduce activity (**Fig. 8**). In *X.*  
346 *campestris* pv. *campestris*, a protease-deficient mutant presented a substantial loss of  
347 pathogenicity in turnip leaves (Dow et al., 1990), whereas the XCV3671 protease of *X.*  
348 *campestris* pv. *vesicatoria* was determined to contribute to virulence in pepper plants and  
349 evidenced to be secreted in association with OMVs from this strain (Solé et al., 2015). Further  
350 research could show if similar enzymes, both proteases and other esterases, are important for *X.*  
351 *citri* infection and citrus canker development.

352         Considering the identified enzymatic activities associated with the *X. citri* OMVs, as well  
353 as the presence of other hydrolases detected by proteomic analyses (**Table S1**), the vesicles may  
354 be an important resource in plant colonization and pathogenesis. The release of products from  
355 the degradation of macromolecules can be another manner in which the vesicles would be related  
356 to nutrient acquisition, acting as public goods for other *X. citri* cells and possibly the microbial  
357 community in general. These processes can facilitate the bacterial colonization of plant tissues  
358 and thus participate in disease development.

359

## 360 **Conclusion**

361         *X. citri* cells express outer membrane tubes and vesicles carrying proteins, molecules, and  
362 ions that may benefit bacterial cells. The OMV lipid profile revealed their higher content of  
363 saturated cardiolipins with a relative impoverishment in unsaturated lipids. This might grant  
364 them more rigidity while maintaining the small diameter of the vesicles. The proteome of the  
365 vesicles revealed an abundance of transporters related to the uptake of nutrient molecules from



366 the medium. This includes receptors for siderophores, which were also potentially detected in the  
367 samples as well as different biologically important metals. Based on these observations, our  
368 hypothesis that the OMVs from *X. citri* can be used for sharing resources in microbial  
369 communities is also supported by the observation that the vesicles' contents can be assimilated  
370 and used for microbial growth. At last, another potential resource packaged with the OMVs is  
371 their esterase and protease activities, which can release nutrients from the plant host tissue and  
372 help to promote microbial colonization, potentially facilitating infection.

373 This work further establishes the association of OMVs with the acquisition and sharing of  
374 nutrient molecules and ions in microbial communities. Microbial interactions can be important  
375 driving forces shaping community structure in oligotrophic habitats such as leaf surfaces  
376 (Schlechter et al., 2019). The balance between this apparently cooperative behavior with  
377 *Xanthomonas*' notorious competitive proclivities conferred by its bactericidal type IV secretion  
378 system (Sgro et al., 2019) may be especially significant for co-occurring epiphytic bacteria and  
379 their own particular interactions with the plant (Hassani et al., 2018). Further research on this  
380 possible indirect modulation of host physiology could reveal unexplored processes emerging  
381 from a pathogen aptly manipulating microbial interaction networks with its diverse suite of  
382 secretions systems.

383

## 384 **Materials and Methods**

### 385 *Bacterial cultures and growth conditions*

386 For all experiments, *Xanthomonas citri* pv. *citri* strain 306 (*X. citri*) was first grown in  
387 liquid LB medium (tryptone, 10 g l<sup>-1</sup>; yeast extract, 5 g l<sup>-1</sup>; NaCl, 10 g l<sup>-1</sup>) at 30 °C to OD 0.3 at  
388 600 nm. The cultures were then inoculated on different solid culture media and incubated at 30

389 °C for 3 days. SB medium (yeast extract, 5 g l<sup>-1</sup>; peptone, 5 g l<sup>-1</sup>; glutamic acid, 1 g l<sup>-1</sup>; sucrose, 5  
390 g l<sup>-1</sup>; pH 7) with 1.5% of agar (w/v) (Ou, 1985), was used for the production and purification of  
391 OMVs.

### 392 Purification of OMVs

393 *X. citri* colonies grown on SB plates at 30 °C for 3 days were scraped from the agar  
394 surfaces and suspended in phosphate buffered saline, PBS (NaCl, 8 g l<sup>-1</sup>; KCl, 0.2 g l<sup>-1</sup>;  
395 Na<sub>2</sub>HPO<sub>4</sub>, 1.44 g l<sup>-1</sup>; KH<sub>2</sub>PO<sub>4</sub>, 0.24 g l<sup>-1</sup>). After homogenization of the suspension, cells were  
396 precipitated by multiple centrifugations steps (10,000 - 30,000 × g at 4 °C, Beckman Avanti J-  
397 30I) until the supernatant appeared clean. Then, the samples were ultracentrifuged at 100,000 × g  
398 at 4 °C for at least 2 hours to pelletize the OMVs. The pellets were resuspended in a small  
399 volume of PBS and filtered through a 0.22 µm syringe filter to remove remaining cells inside a  
400 laminar flow hood. The samples were aseptically manipulated from this step on. The filtered  
401 OMVs were further purified by being loaded at the bottom of a filtered OptiPrep (Sigma) density  
402 gradient (35 to 0% in PBS) and ultracentrifuged at 200,000 × g for at least 12 hours at 4 °C  
403 (Beckman Optima XL-100K). The corresponding clear yellow band was collected, diluted in  
404 PBS, and pelletized again at 100,000 × g for 2 hours to wash out the density gradient medium.  
405 Absence of contamination was determined by lack of growth on LB plates incubated at 30 °C.  
406 DLS (Malvern Zetasizer) was used to characterize the size of the recovered OMVs. Total  
407 proteins in purified samples were quantified by a Qubit 3.0 fluorometer (Thermo Scientific).

### 408 Sodium dodecyl sulfate-polyacrylamide gel electrophoresis (SDS-PAGE)

409 Purified OMV samples were added with SDS-PAGE reducing sample buffer and treated  
410 at 90 °C for 10 minutes. Proteins were separated in 15% Tris-Glycine SDS-PAGE gels and  
411 stained with Coomassie Brilliant Blue.

412 Negative stain transmission electron microscopy (TEM)

413 Samples were applied to glow-discharged carbon film-coated copper grids (400 Mesh,  
414 CF400-Cu, Electron Microscopy Sciences), washed with Milli-Q ultrapure water, and negatively  
415 stained with uranyl acetate 2% (w/v), blotting on filter paper after each step. A FEI Tecnai G20  
416 200 kV TEM (Department of Cell and Developmental Biology, Institute of Biomedical Sciences,  
417 University of São Paulo) or a JEOL JEM 2100 200 kV TEM (Institute of Chemistry, University  
418 of São Paulo) were used for image acquisition.

419 Liquid chromatography-tandem mass spectrometry lipidomics

420 Lipids were extracted by the Bligh and Dyer method (Bligh and Dyer, 1959), using  
421 ethanol-washed glass tubes and glass Pasteur pipettes for all steps. 100 µl of the samples were  
422 added to 400 µl of PBS (50 mM) containing 100 µM of deferoxamine. In the same tubes, 200 µl  
423 of a mix of internal standards (Avanti Polar Lipids and Sigma) and 300 µl of butylated  
424 hydroxytoluene (BHT) in methanol were added. The samples were then mixed with  
425 chloroform/ethyl acetate solution (4:1) and vortexed for 1 minute. Next, the tubes were  
426 centrifuged at  $1,500 \times g$  for 2 minutes at 4 °C and the organic phase at the bottom was collected  
427 and transferred to a clean vial. The solvent was dried under a flow of N<sub>2</sub> and the lipids were  
428 resuspended in 100 µl of isopropyl alcohol. The samples were stored at -80 °C before being  
429 analyzed by a previously established untargeted lipidomic method (Chaves-Filho et al., 2019).

430 Sample preparation for proteomics analysis

431 For in-solution digestion, OMV samples were boiled for 10 minutes before the proteins  
432 were precipitated with ethanol/acetone, and dissolved in urea 8 M in NH<sub>4</sub>HCO<sub>3</sub> 100 mM.  
433 Dithiothreitol (DTT) was added to a final concentration of 10 mM, and the samples were  
434 incubated for 30 min at 37 °C. The samples were cooled down, iodoacetamide was added to a

435 final concentration of 40 mM, and the samples were then incubated for 30 min at room  
436 temperature in the dark. DTT was added again, followed by digestion buffer (NH<sub>4</sub>HCO<sub>3</sub> 50 mM  
437 in a solution of 10% acetonitrile - ACN) to dilute ten times the urea concentration. Trypsin was  
438 added to digestion buffer for a final trypsin to protein ratio of 1:50, and the solution was  
439 incubated overnight at 37 °C. The digestion was stopped by the addition of formic acid (FA).

440 For in-gel digestion (GeLC approach), the gel bands were completely destained, treated  
441 with 10 mM DTT at 56 °C for 45 min, 55 mM IAA at room temperature for 30 min in the dark  
442 and digested at 37 °C for 16 hrs with 2 µg sequencing grade modified trypsin, Porcine  
443 (Promega). The resultant peptides were extracted in 40% ACN/0.1% TFA into fresh Protein  
444 LoBind® microtubes, dried down by vacuum centrifugation, and resuspended in 50 µL 0.1%  
445 TFA. Peptide samples obtained from the in-solution and in-gel digestions were desalted using  
446 C18 disks packed in a p200 pipette tip. Peptides were eluted with 50% ACN and dried down.

#### 447 Nano-flow liquid chromatography-tandem mass spectrometry-based proteomics

448 Tryptic peptides were resuspended in 0.1% FA and analyzed using an EASY-nLC system  
449 (Thermo Scientific) coupled to LTQ-Orbitrap Velos mass spectrometer (Thermo Scientific) at  
450 the Core Facility for Scientific Research at the University of São Paulo (CEFAP-  
451 USP/BIOMASS). The peptides were loaded onto a C18 PicoFrit column (C18 PepMap, 75 µm  
452 id × 10 cm, 3.5 µm particle size, 100 Å pore size; New Objective, Ringoes, NJ, USA) and  
453 separated with a gradient from 100% mobile phase A (0.1% FA) to 34% phase B (0.1% FA, 95%  
454 ACN) during 60 min, 34%–95% in 15 min, and 5 min at 95% phase B at a constant flow rate of  
455 250 nL/min. The LTQ-Orbitrap Velos was operated in positive ion mode with data-dependent  
456 acquisition. The full scan was obtained in the Orbitrap with an automatic gain control target  
457 value of 10<sup>6</sup> ions and a maximum fill time of 500 ms. Each precursor ion scan was acquired at a

458 resolution of 60,000 FWHM in the 400–1500 m/z mass range. Peptide ions were fragmented by  
459 CID MS/MS using a normalized collision energy of 35%. The 20 most abundant peptide were  
460 selected for MS/MS and dynamically excluded for a duration of 30s. All raw data were accessed  
461 in the Xcalibur software (Thermo Scientific).

#### 462 Proteomics data analysis

463 Raw data were processed with MaxQuant (Tyanova et al., 2016) using Andromeda search  
464 engine against the SwissProt *Xanthomonas axonopodis* pv. *citri* (strain 306) database (4354  
465 entries downloaded from UniProt.org, Jan/2021) with common contaminants for protein  
466 identification. Database searches were performed with the following parameters: precursor mass  
467 tolerance of 10 ppm, product ion mass tolerance of 0.6 Da; trypsin cleavage with two missed  
468 cleavage allowed; carbamidomethylation of cysteine (57.021 Da) was set as a fixed modification,  
469 and oxidation of methionine (15.994 Da) and protein N-terminal acetylation (42.010 Da) were  
470 selected as variable modifications. All identifications were filtered to achieve a protein peptide  
471 and PSMs, false discovery rate (FDR) of less than 1%, and a minimum of one unique peptide  
472 was required for protein identification. Protein quantification was based on the MaxQuant label-  
473 free algorithm using both unique and razor peptides for protein quantification. Protein abundance  
474 was assessed on label-free protein quantification (LFQ) based on extracted ion chromatogram  
475 area of the precursor ions activating the matching between run features. Intensity based absolute  
476 quantification (iBAQ) values were used to calculate the relative protein abundance within  
477 samples. MS data have been submitted to the PRIDE repository, project accession: PXD025405,  
478 username: reviewer\_pxd025405@ebi.ac.uk, password: MyMyVfmr.

479 Statistical enrichment analyses of Pfam and InterPro domains and FDR calculations were  
480 obtained from the STRING database (Franceschini et al., 2013). PSORTb 3.0 was used for

481 subcellular localization prediction of the identified proteins (Yu et al., 2010), followed by  
482 manual curation based on sequence annotations, and SignalP 5.0 was used for predicting protein  
483 secretion mechanisms (Armenteros et al., 2019).

484 Elemental analysis by Triple Quadrupole Inductively Coupled Plasma-Mass  
485 Spectrometry

486 Triple Quadrupole Inductively Coupled Plasma-Mass Spectrometry (iCAP TQ ICP-MS,  
487 Thermo Fisher Scientific, Bremen, Germany) equipped with a Micro Mist nebulizer (400  $\mu\text{L}$   
488  $\text{min}^{-1}$ ) combined with a cyclonic spray chamber (both obtained from ESI Elemental Service &  
489 Instruments GmbH, Mainz, Germany) and an auto-sampler ASX-560 (Teledyne CETAC  
490 Technologies, Omaha, NE, USA) was used to perform quantitative analysis of the elements in  
491 OMVs samples. The instrument was tuned prior to the elemental analysis to obtain the highest  
492 sensitivity. The interface was assembled using a nickel sample cone and a nickel skimmer cone  
493 with an insert version for high matrix (3.5 mm).

494 The TQ ICP-MS was operated with 99.999% Argon (Air Products). Helium and oxygen  
495 (99.999%, Linde) were used in the collision/reaction cell of the instrument. A screening (survey  
496 scan) was performed on the OMV samples and the PBS buffer (method blank) to identify the  
497 main chemical elements contained in the sample, recording the full mass spectrum from 4.6 to  
498 245.0 u.. All measurements were performed in triplicate (n=3) according to selected masses  
499 showed in **Table S3**. All data were evaluated with Qtegra ISDS software (Thermo Scientific).

500 Mono-elemental standard solutions were used for calibration curves. Ca, Mn, Fe, Co, Ni,  
501 Cu, Zn, and Ba solutions (PlasmaCAL, SCP Science containing 1000  $\text{mg l}^{-1}$  each) were used to  
502 calibrate these elements. Mg (1000  $\text{mg l}^{-1}$ , CertiPUR, Merck), Se (1000  $\text{mg l}^{-1}$ , Wako Pure  
503 Chemical Industries), oxalate standard for carbon quantification (10000  $\text{mg l}^{-1}$ , TraceCERT,

504 Sigma-Aldrich), and Certified Multielement Ion Chromatography Anion Standard Solution for  
505 Bromine and Sulfur quantification (10 mg l<sup>-1</sup>, TraceCERT, Sigma-Aldrich) were also used to  
506 calibrate these respectively elements. The OMV samples were diluted to 500 µl with PBS buffer  
507 prior to TQ ICP-MS analysis and PBS was used as a method blank. **Table S4** displays the main  
508 analytical performance characteristics achieved: linear range, sensitivity, limit of detection  
509 (LOD), and coefficient of determination.

510 Instrumental precision was checked by stability tests throughout the analysis (obtaining a  
511 relative standard deviation of less than 3% for all analytes) and the accuracy was checked by  
512 spike and recovery tests at four different levels of concentration, obtaining acceptable values  
513 ranging from 93 to 105%.

#### 514 *Siderophore detection and bacterial growth assays*

515 The presence of siderophores in the purified OMVs was tested on chrome azurol S (CAS)  
516 agar plates (Schwyn and Neilands, 1987), prepared according to Louden et al. (2011). Bacterial  
517 growth using purified OMVs as sole carbon sources was assayed in M9 minimal medium  
518 without glucose (Na<sub>2</sub>HPO<sub>4</sub>, 6.8 g l<sup>-1</sup>; KH<sub>2</sub>PO<sub>4</sub>, 3 g l<sup>-1</sup>; NH<sub>4</sub>Cl, 1 g l<sup>-1</sup>; NaCl, 0.5 g l<sup>-1</sup>; MgSO<sub>4</sub>, 2  
519 mM; CaCl<sub>2</sub>, 2 mM). About 10<sup>3</sup> stationary phase cells l<sup>-1</sup>, equivalent to around 10 colony forming  
520 units (CFU) for each 10 µl droplet plated, were used as the initial population for the experiments.  
521 To the samples, 0, 125, or 375 µg ml<sup>-1</sup> of total OMV proteins were added, and the tubes were  
522 incubated at 30 °C in a thermomixer for 48 h. Aliquots were taken at regular intervals and plated  
523 in LB medium for CFU quantification.

#### 524 *Esterase activity assays*

525 Esterase qualitative assays were performed on either LB plates prepared with 0.5%  
526 tributyrin emulsified by sonication (SONICS Vibra-Cell), or NYG plates (peptone, 5 g l<sup>-1</sup>; yeast

527 extract, 5 g l<sup>-1</sup>; glycerol, 20 g l<sup>-1</sup>, agar, 1% (Turner et al., 1984)) containing 1% of Tween 20 and  
528 4 mM of CaCl<sub>2</sub> (Ramnath et al., 2017). Esterase enzymatic activity was measured  
529 colorimetrically with a reaction mixture (100 mM Tris-HCl pH 7.5, 50 mM NaCl) containing  
530 500 μM of pNP-C4 or 200 μM of pNP-C8 with the addition of 10, 20, or 50 μg ml<sup>-1</sup> of total  
531 proteins of purified OMVs in microplate wells. The reactions were incubated at 30 °C and their  
532 absorbance at 400 nm was measured with a SpectraMax Paradigm microplate reader (Molecular  
533 Devices) at regular intervals of time during 4 h.

#### 534 Protease activity assays

535 Protease assays were performed with a protease fluorescent detection kit using casein  
536 labeled with fluorescein isothiocyanate (FITC) as the substrate following the manufacturer's  
537 instructions (PF0100, Sigma-Aldrich). Briefly, 10 μl of the test samples were added to 40 μl of  
538 FITC-casein in incubation buffer and incubated at 30 °C for 6 hours. PBS was used as a blank,  
539 and the reactions contained 100, 200, or 300 μg ml<sup>-1</sup> of total proteins of purified OMVs. For  
540 some assays, EDTA-free Pierce Protease Inhibitor (A32965, Thermo Scientific) was added to  
541 300 μg ml<sup>-1</sup> samples to a final concentration equivalent to the manufacturer's recommendations  
542 (1 tablet for 50 ml of solution). After incubation, undigested substrate was precipitated with the  
543 addition of 150 μl of trichloroacetic acid 0.6 N for 30 min at 37 °C. Aliquots of the supernatants  
544 containing FITC-labeled fragments were diluted in assay buffer and analyzed in a black 96-well  
545 microplate with a SpectraMax Paradigm microplate reader (Molecular Devices). Relative  
546 fluorescence units (RFU) were measured with excitation at 485 nm and detection at 535 nm. All  
547 samples presented RFU measurements substantially above 120% of the value obtained with the  
548 blank (data not shown), which is considered significant according to the kit's manufacturer.

549



## 550 **Acknowledgements**

551           The authors would like to thank Roberto Cabado Modia Junior and Alfredo Duarte for the  
552 technical assistance at the electron microscopy facilities, Thais Viggiani Santana for the  
553 assistance at the proteomics facility, and Tania Geraldine Churasacari Vinces for the assistance  
554 with the esterase activity experiments.

555           We thank the Core Facility for Scientific Research – University of São Paulo (CEFAP-  
556 USP/BIOMASS) for the proteomic analysis. The authors acknowledge financial support from the  
557 São Paulo Research Foundation (FAPESP): grants 2019/00195-2 and 2020/04680-0 to CRG,  
558 2017/17303-7 to CSF, 2014/06863-3, 2018/18257-1 and 2018/15549-1 to GP, 2013/07937-8 to  
559 SM, 2016/09047-8 to RFdS, 2017/20752-8 to the EMU TQ ICP-MS facility at IPT, and  
560 scholarships 2018/21076-9 to GGA, 2017/24301-0 to MMC, 2017/10611-8 to ADP,  
561 2019/12234-2 to EEL, and 2017/13804-1 to AI. The authors also acknowledge financial support  
562 from the Coordenação de Aperfeiçoamento de Pessoal de Nível Superior (CAPES) in the form of  
563 scholarships to MMY, IT, and GGA (88887.336498/2019-00), and the Brazilian National  
564 Council for Scientific and Technological Development (CNPq) for RP grants 380490/2018-8 and  
565 380939/2020-7.

566

## 567 **References**

568 Aebi, C., Stone, B., Beucher, M., Cope, L.D., Maciver, I., Thomas, S.E. et al. (1996) Expression  
569 of the CopB outer membrane protein by *Moraxella catarrhalis* is regulated by iron and affects  
570 iron acquisition from transferrin and lactoferrin. *Infect Immun* **64**: 2024-2030.

571 Alvarez-Martinez, C.E., Sgro, G.G., Araujo, G.G., Paiva, M.R.N., Matsuyama, B.Y., Guzzo,  
572 C.R. et al. (2021) Secrete or perish: The role of secretion systems in *Xanthomonas* biology.  
573 *Computational and Structural Biotechnology Journal* **19**: 279-302.

574 Aparna, G., Chatterjee, A., Sonti, R.V., and Sankaranarayanan, R. (2009) A Cell Wall–  
575 Degrading Esterase of *Xanthomonas oryzae* Requires a Unique Substrate Recognition Module  
576 for Pathogenesis on Rice. *The Plant Cell* **21**: 1860-1873.

577 Armenteros, J.J.A., Tsirigos, K.D., Sonderby, C.K., Petersen, T.N., Winther, O., Brunak, S. et al.  
578 (2019) SignalP 5.0 improves signal peptide predictions using deep neural networks. *Nature*  
579 *Biotechnology* **37**: 420-+.

580 Assis, R.D.B., Polloni, L.C., Patane, J.S.L., Thakur, S., Felestrino, E.B., Diaz-Caballero, J. et al.  
581 (2017) Identification and analysis of seven effector protein families with different adaptive and  
582 evolutionary histories in plant-associated members of the Xanthomonadaceae. *Scientific Reports*  
583 **7**.

584 Aznar, A., and Dellagi, A. (2015) New insights into the role of siderophores as triggers of plant  
585 immunity: what can we learn from animals? *Journal of Experimental Botany* **66**: 3001-3010.

586 Bahar, O., Mordukhovich, G., Luu, D.D., Schwessinger, B., Daudi, A., Jehle, A.K. et al. (2016)  
587 Bacterial Outer Membrane Vesicles Induce Plant Immune Responses. *Molecular Plant-Microbe*  
588 *Interactions* **29**: 374-384.

589 Beltran-Heredia, E., Tsai, F.C., Salinas-Almaguer, S., Cao, F.J., Bassereau, P., and Monroy, F.  
590 (2019) Membrane curvature induces cardiolipin sorting. *Communications Biology* **2**.

591 Biller, S.J., Schubotz, F., Roggensack, S.E., Thompson, A.W., Summons, R.E., and Chisholm,  
592 S.W. (2014) Bacterial vesicles in marine ecosystems. *Science* **343**: 183-186.

- 593 Blanvillain, S., Meyer, D., Boulanger, A., Lautier, M., Guynet, C., Denance, N. et al. (2007)  
594 Plant Carbohydrate Scavenging through TonB-Dependent Receptors: A Feature Shared by  
595 Phytopathogenic and Aquatic Bacteria. *Plos One* **2**.
- 596 Bligh, E.G., and Dyer, W.J. (1959) A Rapid Method of Total Lipid Extraction and Purification.  
597 *Canadian Journal of Biochemistry and Physiology* **37**: 911-917.
- 598 Büttner, D., and Bonas, U. (2010) Regulation and secretion of Xanthomonas virulence factors.  
599 *Fems Microbiology Reviews* **34**: 107-133.
- 600 Cao, P., and Wall, D. (2019) Direct visualization of a molecular handshake that governs kin  
601 recognition and tissue formation in myxobacteria. *Nature Communications* **10**: 3073.
- 602 Chaves-Filho, A.B., Pinto, I.F.D., Dantas, L.S., Xavier, A.M., Inague, A., Faria, R.L. et al.  
603 (2019) Alterations in lipid metabolism of spinal cord linked to amyotrophic lateral sclerosis.  
604 *Scientific Reports* **9**: 11642.
- 605 Coughlin, R.T., Tonsager, S., and MCGroarty, E.J. (1983) Quantitation of Metal-Cations Bound  
606 to Membranes and Extracted Lipopolysaccharide of Escherichia-Coli. *Biochemistry* **22**: 2002-  
607 2007.
- 608 Dejean, G., Blanvillain-Baufume, S., Boulanger, A., Darrasse, A., de Bernonville, T.D., Girard,  
609 A.L. et al. (2013) The xylan utilization system of the plant pathogen Xanthomonas campestris pv  
610 campestris controls epiphytic life and reveals common features with oligotrophic bacteria and  
611 animal gut symbionts. *New Phytologist* **198**: 899-915.
- 612 Dey, A., and Wall, D. (2014) A Genetic Screen in Myxococcus xanthus Identifies Mutants That  
613 Uncouple Outer Membrane Exchange from a Downstream Cellular Response. *Journal of*  
614 *Bacteriology* **196**: 4324-4332.

- 615 Dow, J.M., Clarke, B.R., Milligan, D.E., Tang, J.L., and Daniels, M.J. (1990) Extracellular  
616 Proteases from *Xanthomonas campestris* pv. *Campestris*, the Black Rot Pathogen. *Applied and*  
617 *Environmental Microbiology* **56**: 2994-2998.
- 618 Elhenawy, W., Debelyy, M.O., and Feldman, M.F. (2014) Preferential Packing of Acidic  
619 Glycosidases and Proteases into Bacteroides Outer Membrane Vesicles. *Mbio* **5**.
- 620 Evans, A.G.L., Davey, H.M., Cookson, A., Currinn, H., Cooke-Fox, G., Stanczyk, P.J., and  
621 Whitworth, D.E. (2012) Predatory activity of Myxococcus xanthus outer-membrane vesicles and  
622 properties of their hydrolase cargo. *Microbiology* **158**: 2742-2752.
- 623 Feitosa-Junior, O.R., Stefanello, E., Zaini, P.A., Nascimento, R., Pierry, P.M., Dandekar, A.M. et  
624 al. (2019) Proteomic and Metabolomic Analyses of Xylella fastidiosa OMV-Enriched Fractions  
625 Reveal Association with Virulence Factors and Signaling Molecules of the DSF Family.  
626 *Phytopathology* **109**: 1344-1353.
- 627 Fett, W.F., Gerard, H.C., Moreau, R.A., Osman, S.F., and Jones, L.E. (1992) Screening of  
628 Nonfilamentous Bacteria for Production of Cutin-Degrading Enzymes. *Applied and*  
629 *Environmental Microbiology* **58**: 2123-2130.
- 630 Figaj, D., Ambroziak, P., Przepiora, T., and Skorko-Glonek, J. (2019) The Role of Proteases in  
631 the Virulence of Plant Pathogenic Bacteria. *International Journal of Molecular Sciences* **20**.
- 632 Fischer, T., Schorb, M., Reintjes, G., Kolovou, A., Santarella-Mellwig, R., Markert, S. et al.  
633 (2019) Biopearling of Interconnected Outer Membrane Vesicle Chains by a Marine  
634 Flavobacterium. *Applied and Environmental Microbiology* **85**: e00829-00819.
- 635 Franceschini, A., Szklarczyk, D., Frankild, S., Kuhn, M., Simonovic, M., Roth, A. et al. (2013)  
636 STRING v9.1: protein-protein interaction networks, with increased coverage and integration.  
637 *Nucleic Acids Research* **41**: D808-D815.

- 638 Guerrero-Mandujano, A., Hernandez-Cortez, C., Ibarra, J.A., and Castro-Escarpulli, G. (2017)  
639 The outer membrane vesicles: Secretion system type zero. *Traffic* **18**: 425-432.
- 640 Hampton, C.M., Guerrero-Ferreira, R.C., Storms, R.E., Taylor, J.V., Yi, H., Gulig, P.A., and  
641 Wright, E.R. (2017) The Opportunistic Pathogen *Vibrio vulnificus* Produces Outer Membrane  
642 Vesicles in a Spatially Distinct Manner Related to Capsular Polysaccharide. *Frontiers in*  
643 *Microbiology* **8**.
- 644 Hase, C.C., and Finkelstein, R.A. (1993) Bacterial Extracellular Zinc-Containing  
645 Metalloproteases. *Microbiological Reviews* **57**: 823-837.
- 646 Hassani, M.A., Duran, P., and Hacquard, S. (2018) Microbial interactions within the plant  
647 holobiont. *Microbiome* **6**.
- 648 Hellman, J., Loiselle, P.M., Zanzot, E.M., Allaire, J.E., Tehan, M.M., Boyle, L.A. et al. (2000)  
649 Release of gram-negative outer-membrane proteins into human serum and septic rat blood and  
650 their interactions with immunoglobulin in antiserum to *Escherichia coli* J5. *J Infect Dis* **181**:  
651 1034-1043.
- 652 Hickey, C.A., Kuhn, K.A., Donermeyer, D.L., Porter, N.T., Jin, C., Cameron, E.A. et al. (2015)  
653 Colitogenic *Bacteroides thetaiotaomicron* Antigens Access Host Immune Cells in a Sulfatase-  
654 Dependent Manner via Outer Membrane Vesicles. *Cell Host Microbe* **17**: 672-680.
- 655 Hou, S.G., Jamieson, P., and He, P. (2018) The cloak, dagger, and shield: proteases in plant-  
656 pathogen interactions. *Biochemical Journal* **475**: 2491-2509.
- 657 Katsir, L., and Bahar, O. (2017) Bacterial outer membrane vesicles at the plant-pathogen  
658 interface. *Plos Pathogens* **13**.

- 659 Kim, Y.R., Kim, B.U., Kim, S.Y., Kim, C.M., Na, H.S., Koh, J.T. et al. (2010) Outer membrane  
660 vesicles of *Vibrio vulnificus* deliver cytolsin-hemolysin Vvha into epithelial cells to induce  
661 cytotoxicity. *Biochemical and Biophysical Research Communications* **399**: 607-612.
- 662 Krewulak, K.D., and Vogel, H.J. (2011) TonB or not TonB: is that the question? *Biochemistry  
663 and Cell Biology* **89**: 87-97.
- 664 Lappann, M., Otto, A., Becher, D., and Vogel, U. (2013) Comparative proteome analysis of  
665 spontaneous outer membrane vesicles and purified outer membranes of *Neisseria meningitidis*. *J  
666 Bacteriol* **195**: 4425-4435.
- 667 Lin, T.Y., and Weibel, D.B. (2016) Organization and function of anionic phospholipids in  
668 bacteria. *Applied Microbiology and Biotechnology* **100**: 4255-4267.
- 669 Louden, B.C., Haarmann, D., and Lynne, A.M. (2011) Use of Blue Agar CAS Assay for  
670 Siderophore Detection. *Journal of Microbiology & Biology Education* **12**: 51-53.
- 671 Macdonald, I.A., and Kuehn, M.J. (2013) Stress-induced outer membrane vesicle production by  
672 *Pseudomonas aeruginosa*. *J Bacteriol* **195**: 2971-2981.
- 673 Maredia, R., Devineni, N., Lentz, P., Dallo, S.F., Yu, J., Guentzel, N. et al. (2012) Vesiculation  
674 from *Pseudomonas aeruginosa* under SOS. *ScientificWorldJournal* **2012**: 402919.
- 675 McBroom, A.J., and Kuehn, M.J. (2007) Release of outer membrane vesicles by Gram-negative  
676 bacteria is a novel envelope stress response. *Mol Microbiol* **63**: 545-558.
- 677 McCaig, W.D., Koller, A., and Thanassi, D.G. (2013) Production of Outer Membrane Vesicles  
678 and Outer Membrane Tubes by *Francisella novicida*. *Journal of Bacteriology* **195**: 1120-1132.
- 679 Nascimento, R., Gouran, H., Chakraborty, S., Gillespie, H.W., Almeida-Souza, H.O., Tu, A. et  
680 al. (2016) The Type II Secreted Lipase/Esterase LesA is a Key Virulence Factor Required for  
681 *Xylella fastidiosa* Pathogenesis in Grapevines. *Scientific Reports* **6**.

- 682 Ou, S.H. (1985) Bacterial leaf blight. In *Rice Diseases*: Commonwealth Mycological Institute,  
683 pp. 61-96.
- 684 Pirbadian, S., Barchinger, S.E., Leung, K.M., Byun, H.S., Jangir, Y., Bouhenni, R.A. et al.  
685 (2014) Shewanella oneidensis MR-1 nanowires are outer membrane and periplasmic extensions  
686 of the extracellular electron transport components. *Proceedings of the National Academy of*  
687 *Sciences of the United States of America* **111**: 12883-12888.
- 688 Pirbadian, S., Barchinger, S.E., Leung, K.M., Byun, H.S., Jangir, Y., Bouhenni, R.A. et al.  
689 (2015) Bacterial Nanowires of Shewanella Oneidensis MR-1 are Outer Membrane and  
690 Periplasmic Extensions of the Extracellular Electron Transport Components. *Biophysical Journal*  
691 **108**: 368a-368a.
- 692 Planas-Iglesias, J., Dwarakanath, H., Mohammadyani, D., Yanamala, N., Kagan, V.E., and  
693 Klein-Seetharaman, J. (2015) Cardiolipin Interactions with Proteins. *Biophysical Journal* **109**:  
694 1282-1294.
- 695 Rakoff-Nahoum, S., Coyne, M.J., and Comstock, L.E. (2014) An ecological network of  
696 polysaccharide utilization among human intestinal symbionts. *Curr Biol* **24**: 40-49.
- 697 Ramnath, L., Sithole, B., and Govinden, R. (2017) Identification of lipolytic enzymes isolated  
698 from bacteria indigenous to Eucalyptus wood species for application in the pulping industry.  
699 *Biotechnology Reports* **15**: 114-124.
- 700 Remis, J.P., Wei, D.G., Gorur, A., Zemla, M., Haraga, J., Allen, S. et al. (2014) Bacterial social  
701 networks: structure and composition of Myxococcus xanthus outer membrane vesicle chains.  
702 *Environmental Microbiology* **16**: 598-610.

- 703 Renner, L.D., and Weibel, D.B. (2011) Cardiolipin microdomains localize to negatively curved  
704 regions of Escherichia coli membranes. *Proceedings of the National Academy of Sciences of the*  
705 *United States of America* **108**: 6264-6269.
- 706 Sampath, V., McCaig, W.D., and Thanassi, D.G. (2018) Amino acid deprivation and central  
707 carbon metabolism regulate the production of outer membrane vesicles and tubes by Francisella.  
708 *Molecular Microbiology* **107**: 523-541.
- 709 Schlechter, R.O., Miebach, M., and Remus-Emsermann, M.N.P. (2019) Driving factors of  
710 epiphytic bacterial communities: A review. *Journal of Advanced Research* **19**: 57-65.
- 711 Schwechheimer, C., and Kuehn, M.J. (2013) Synthetic effect between envelope stress and lack  
712 of outer membrane vesicle production in Escherichia coli. *J Bacteriol* **195**: 4161-4173.
- 713 Schwechheimer, C., and Kuehn, M.J. (2015) Outer-membrane vesicles from Gram-negative  
714 bacteria: biogenesis and functions. *Nature Reviews Microbiology* **13**: 605-619.
- 715 Schwyn, B., and Neilands, J.B. (1987) Universal Chemical-Assay for the Detection and  
716 Determination of Siderophores. *Analytical Biochemistry* **160**: 47-56.
- 717 Sgro, G.G., Oka, G.U., Souza, D.P., Cenens, W., Bayer-Santos, E., Matsuyama, B.Y. et al.  
718 (2019) Bacteria-Killing Type IV Secretion Systems. *Frontiers in Microbiology* **10**.
- 719 Shetty, A., Chen, S.C., Tocheva, E.I., Jensen, G.J., and Hickey, W.J. (2011) Nanopods: A New  
720 Bacterial Structure and Mechanism for Deployment of Outer Membrane Vesicles. *Plos One* **6**.
- 721 Sidhu, V.K., Vorholter, F.J., Niehaus, K., and Watt, S.A. (2008) Analysis of outer membrane  
722 vesicle associated proteins isolated from the plant pathogenic bacterium Xanthomonas  
723 campestris pv. campestris. *Bmc Microbiology* **8**.
- 724 Sjöström, A.E., Sandblad, L., Uhlin, B.E., and Wai, S.N. (2015) Membrane vesicle-mediated  
725 release of bacterial RNA. *Scientific Reports* **5**.



- 726 Solé, M., Scheibner, F., Hoffmeister, A.K., Hartmann, N., Hause, G., Rother, A. et al. (2015)  
727 *Xanthomonas campestris* pv. *vesicatoria* Secretes Proteases and Xylanases via the Xps Type II  
728 Secretion System and Outer Membrane Vesicles. *Journal of Bacteriology* **197**: 2879-2893.
- 729 Sorice, M., Manganelli, V., Matarrese, P., Tinari, A., Misasi, R., Malorni, W., and Garofalo, T.  
730 (2009) Cardiolipin-enriched raft-like microdomains are essential activating platforms for  
731 apoptotic signals on mitochondria. *Febs Letters* **583**: 2447-2450.
- 732 Tamir-Ariel, D., Rosenberg, T., Navon, N., and Burdman, S. (2012) A secreted lipolytic enzyme  
733 from *Xanthomonas campestris* pv. *vesicatoria* is expressed in planta and contributes to its  
734 virulence. *Molecular Plant Pathology* **13**: 556-567.
- 735 Tashiro, Y., Inagaki, A., Shimizu, M., Ichikawa, S., Takaya, N., Nakajima-Kambe, T. et al.  
736 (2011) Characterization of Phospholipids in Membrane Vesicles Derived from *Pseudomonas*  
737 *aeruginosa*. *Bioscience Biotechnology and Biochemistry* **75**: 605-607.
- 738 Tayi, L., Maku, R.V., Patel, H.K., and Sonti, R.V. (2016) Identification of Pectin Degrading  
739 Enzymes Secreted by *Xanthomonas oryzae* pv. *oryzae* and Determination of Their Role in  
740 Virulence on Rice. *Plos One* **11**.
- 741 Toledo, A., Coleman, J.L., Kuhlow, C.J., Crowley, J.T., and Benach, J.L. (2012) The enolase of  
742 *Borrelia burgdorferi* is a plasminogen receptor released in outer membrane vesicles. *Infect*  
743 *Immun* **80**: 359-368.
- 744 Toyofuku, M., Nomura, N., and Eberl, L. (2019) Types and origins of bacterial membrane  
745 vesicles. *Nature Reviews Microbiology* **17**: 13-24.
- 746 Turner, P., Barber, C., and Daniels, M. (1984) Behavior of the Transposons Tn5 and Tn7 in  
747 *Xanthomonas-Campestris* Pv *Campestris*. *Molecular & General Genetics* **195**: 101-107.

748 Tyanova, S., Temu, T., and Cox, J. (2016) The MaxQuant computational platform for mass  
749 spectrometry-based shotgun proteomics. *Nature Protocols* **11**: 2301-2319.

750 Ueda, H., Kurose, D., Kugimiya, S., Mitsuhashi, I., Yoshida, S., Tabata, J. et al. (2018) Disease  
751 severity enhancement by an esterase from non-phytopathogenic yeast *Pseudozyma antarctica* and  
752 its potential as adjuvant for biocontrol agents. *Scientific Reports* **8**.

753 Yu, N.Y., Wagner, J.R., Laird, M.R., Melli, G., Rey, S., Lo, R. et al. (2010) PSORTb 3.0:  
754 improved protein subcellular localization prediction with refined localization subcategories and  
755 predictive capabilities for all prokaryotes. *Bioinformatics* **26**: 1608-1615.

756 Zwarycz, A.S., Livingstone, P.G., and Whitworth, D.E. (2020) Within-species variation in OMV  
757 cargo proteins: the *Myxococcus xanthus* OMV pan-proteome. *Molecular Omics* **16**: 387-397.

758

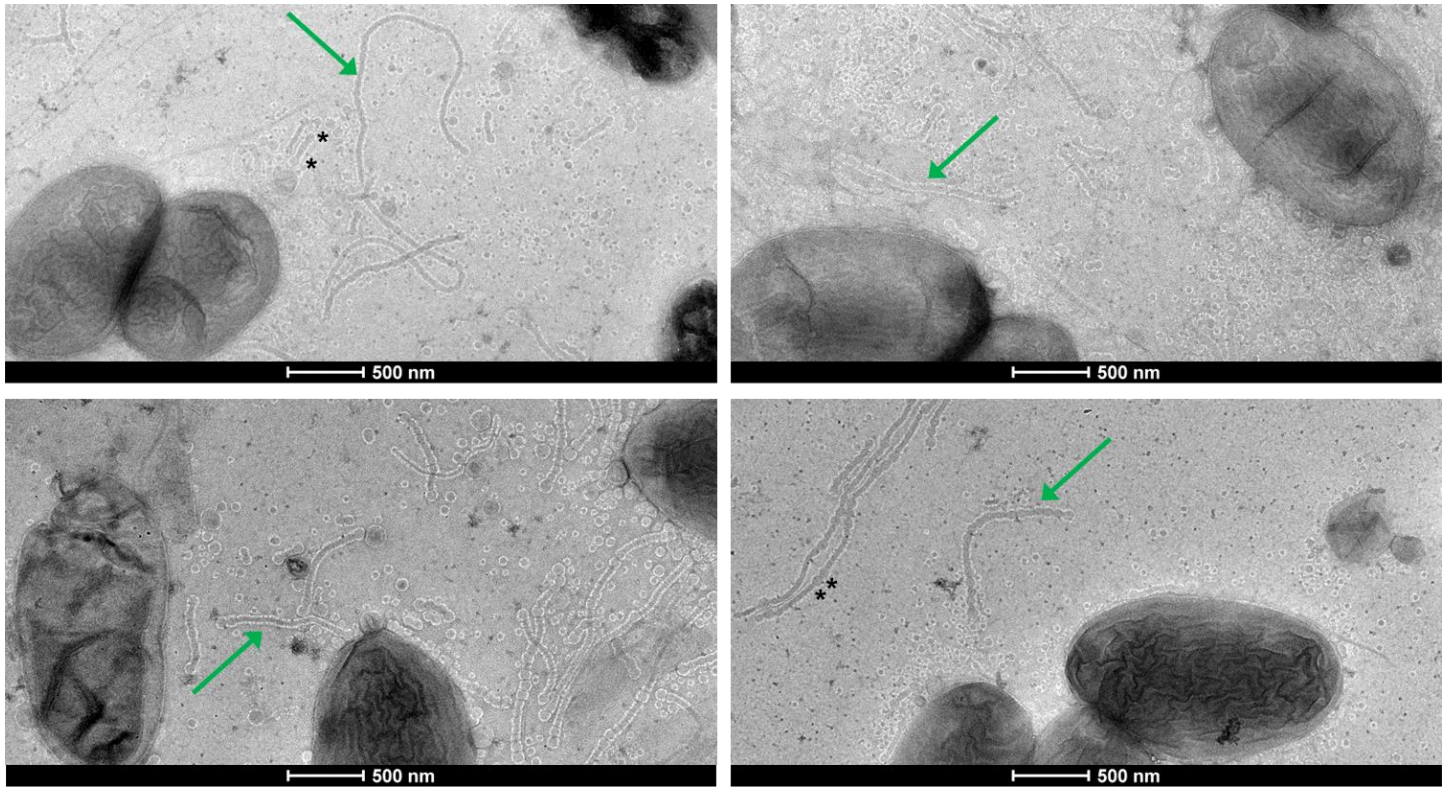

759

760 **Fig. 1.** Outer membrane tubes and vesicles from *X. citri*. Cells were grown in SB with  
761 agar 0.6% and imaged by negative stain TEM. The green arrows point to examples of the outer  
762 membrane tubes that can be seen in the images. Asterisks (\*) indicate some occurrences of larger  
763 vesicles at the tips or within tubes.

764

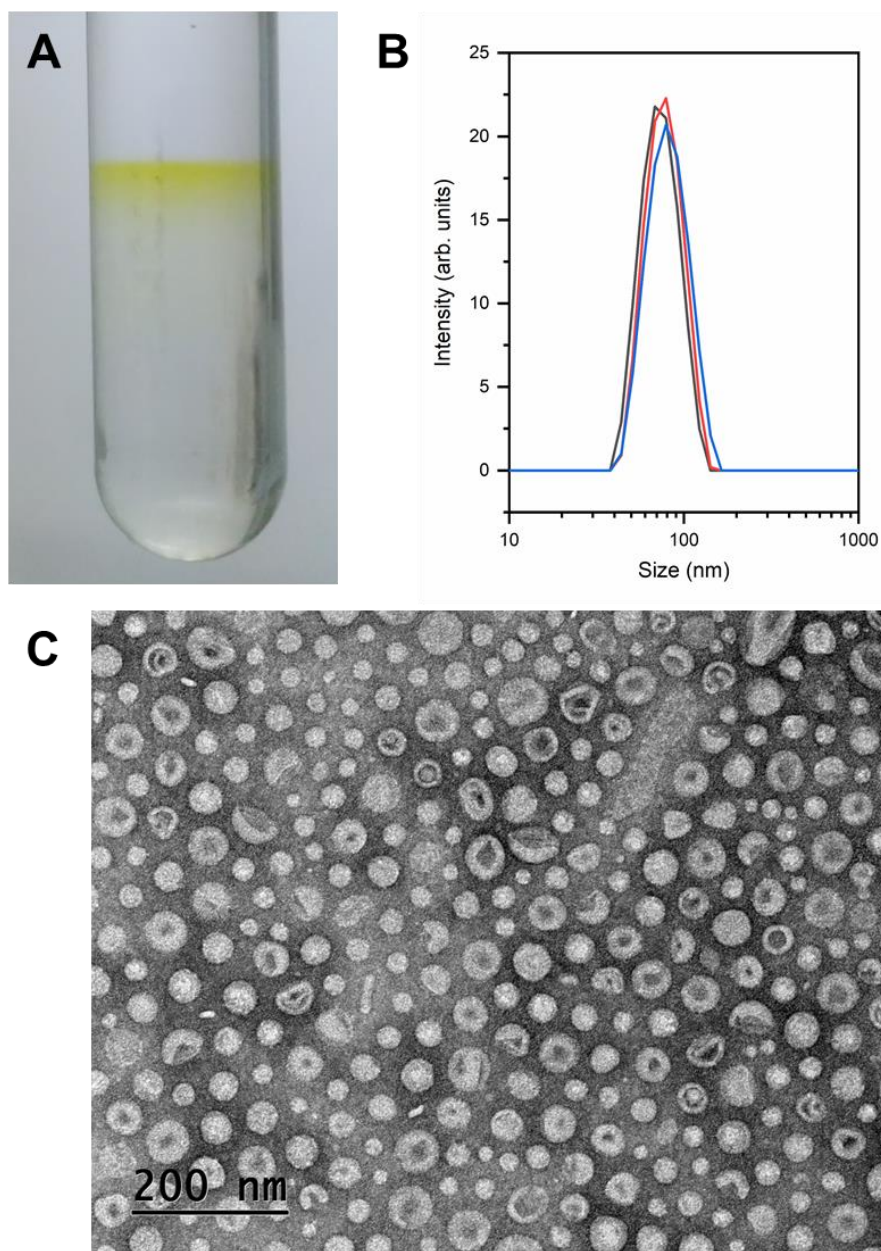

765

766 **Fig. 2.** Purification and characterization of the *X. citri* outer membrane vesicles (OMVs).

767 Vesicles were retrieved as a yellow band from the density gradient centrifugation tubes (A). The

768 vesicle size distribution was determined by DLS and observed to range from about 40 to 150 nm

769 in diameter, with a peak near 75 nm (B). Observation by negative stain TEM confirmed the

770 purification of the OMVs, allowing the evaluation of their size, morphology, and lack of

771 contaminating cells (C).

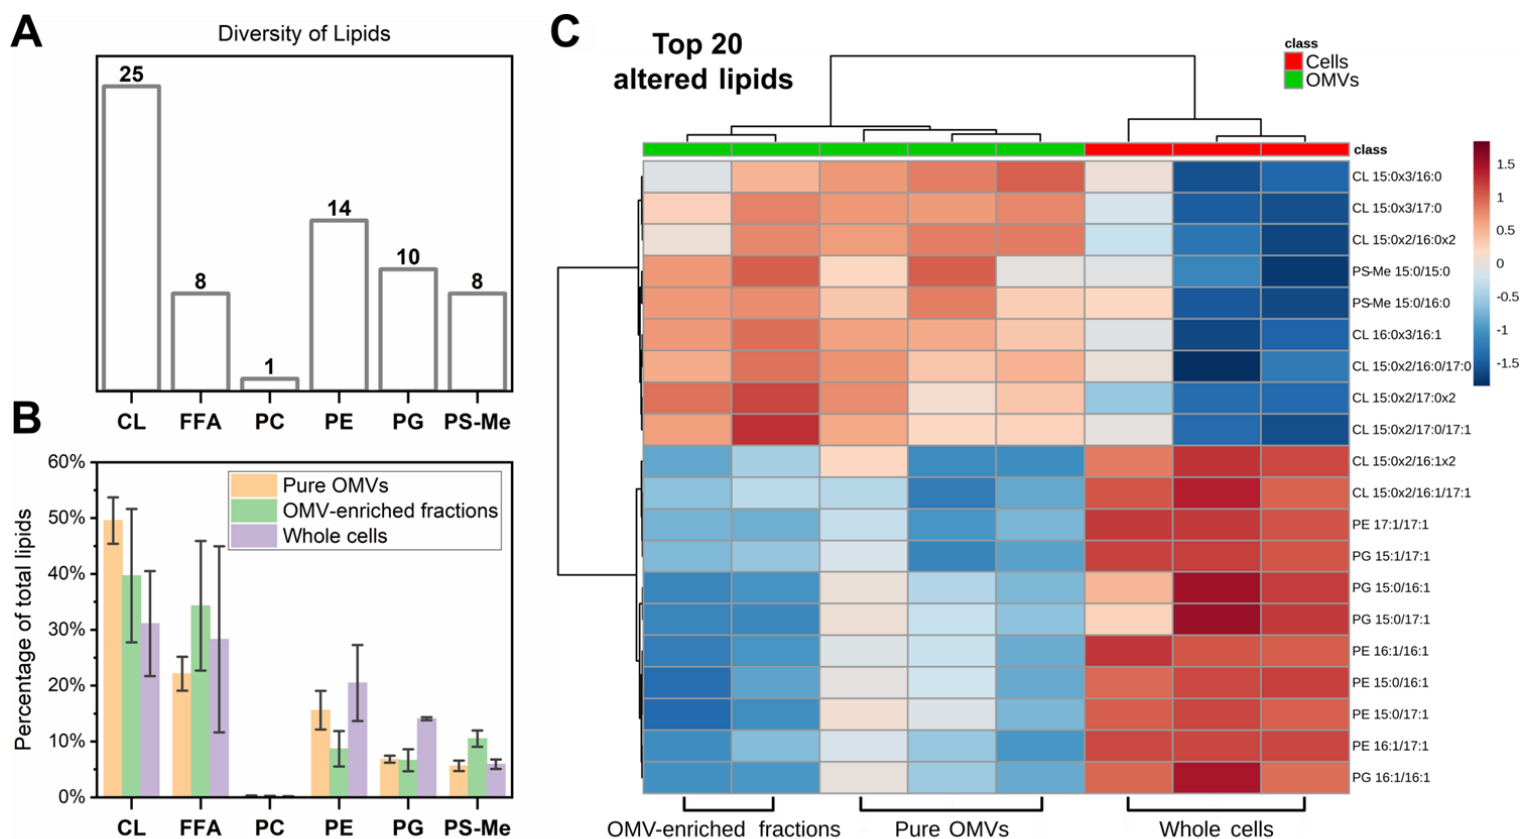

772 **Fig. 3.** Lipidomic analysis of *X. citri* whole cells and OMVs. A total of 66 different lipids  
773 were identified in the samples, divided into 6 subclasses: cardiolipin (CL), free fatty acids (FFA),  
774 phosphatidylcholine (PC), phosphatidylethanolamine (PE), phosphatidylglycerol (PG),  
775 methylated-phosphatidylserine (PS-Me), shown in panel A. The proportion of each lipid subclass  
776 varied between the different samples: Pure OMVs, OMV-enriched fractions (partially purified),  
777 and whole cells (B). The 20 most altered lipids between the different samples (identified from a  
778 volcano plot analysis, fold-change > 1.5,  $p < 0.05$  evaluated by FDR-adjusted t-test, **Fig. S2**)  
779 were clustered in a heatmap (according to one-way ANOVA), revealing the vesicles are enriched  
780 in saturated cardiolipins in comparison to the cells, while being relatively impoverished in a  
781 number of different unsaturated lipid species (C). The notation used to represent the lipids from  
782 the different subclasses gives the number of carbon atoms and of double bonds separated by a  
783 colon for each acyl chain, which in turn are separated by a slash.

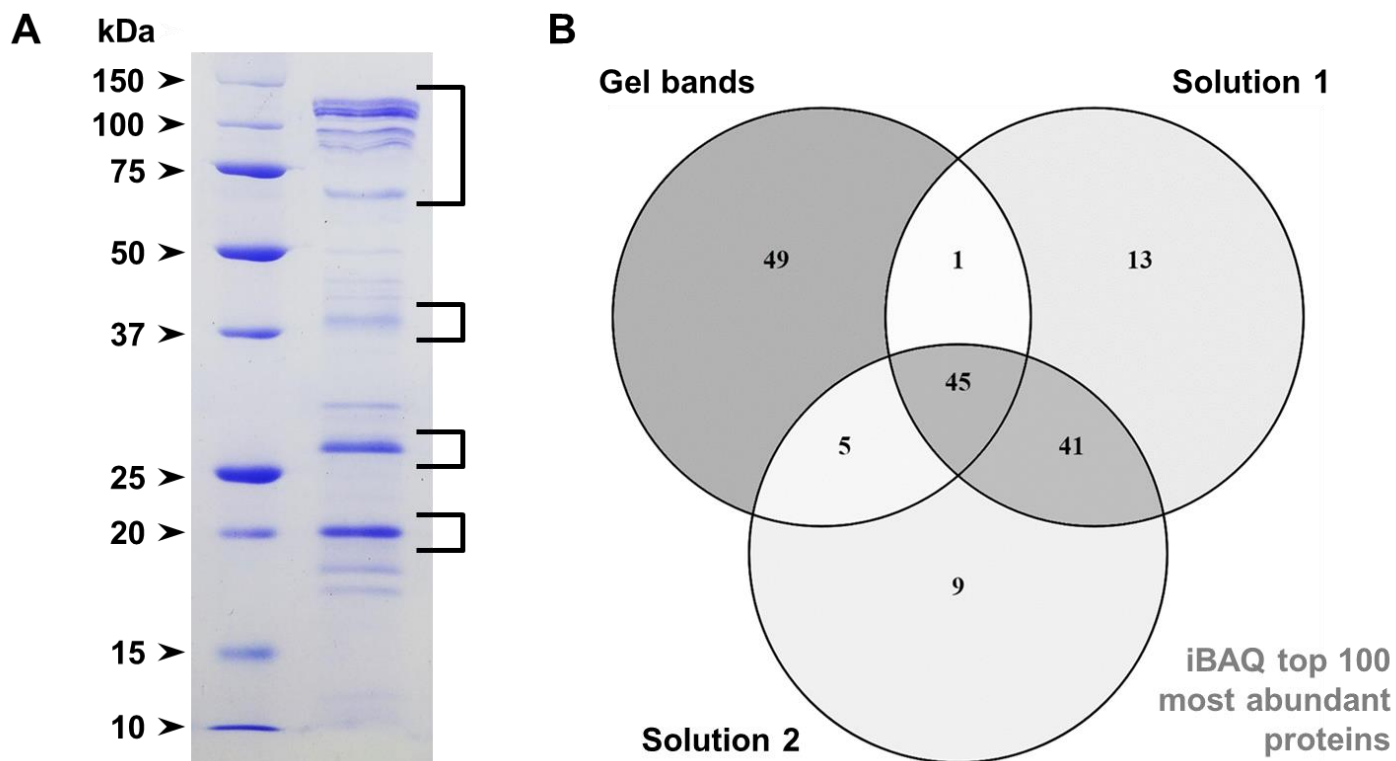

784

785 **Fig. 4.** Proteomic analysis of *X. citri* OMV samples. Panel A shows characteristic protein  
786 bands associated with the purified OMVs that could be observed in 15% Tris-Glycine SDS-  
787 PAGE gels. Four regions containing the main bands (square brackets) were processed by in-gel  
788 digestion for proteomic analyses; their data were combined (“gel bands”) and compared to two  
789 samples of pure OMV suspensions processed by in-solution digestion (“solution 1” and “solution  
790 2”). Panel B presents a Venn diagram displaying the intersection of the top 100 most abundant  
791 proteins for each sample determined by their iBAQ values.

792

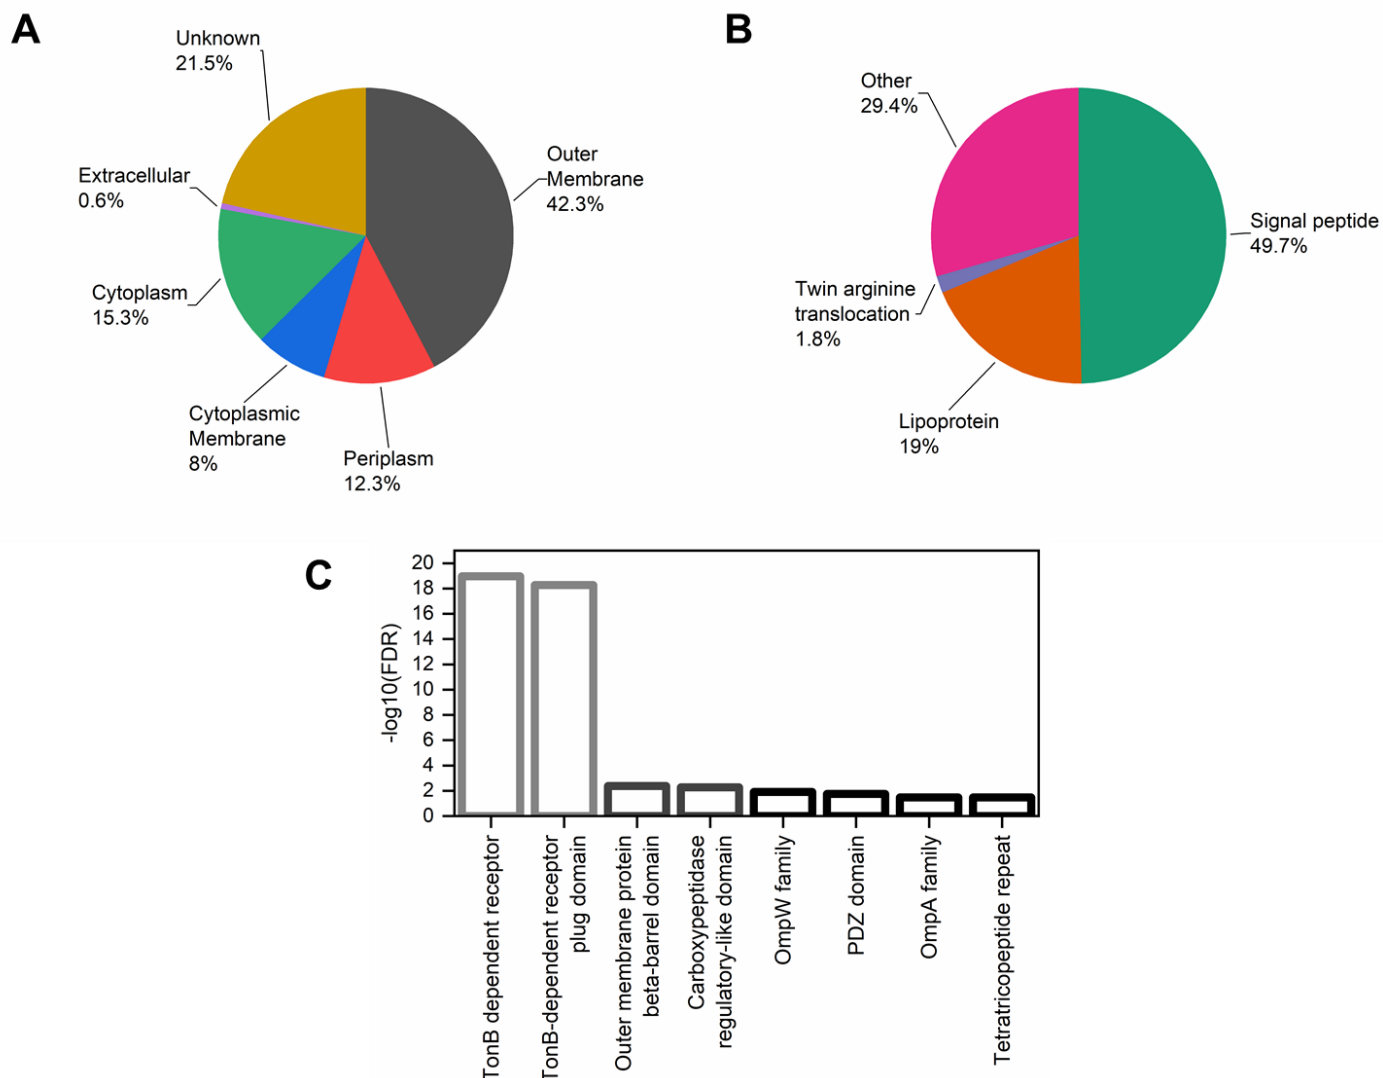

793  
794 **Fig. 5.** Subcellular localization and domain enrichment of the most abundant proteins  
795 identified in the purified *X. citri* OMV samples. Panel A presents the subcellular protein  
796 localization predicted by PSORTb, manually curated based on sequence annotations, while panel  
797 B shows their secretion mechanisms predicted by SignalP. Panel C displays the most  
798 significantly enriched Pfam domains found in the OMVs compared to the *X. citri* pv. *citri* 306  
799 genome. The lowest false discovery rate (FDR), thus the highest  $-\log_{10}(\text{FDR})$ , was observed for  
800 TonB-dependent receptor domains (Pfam family PF00593). These analyses were performed with

801 the combination of the top 100 proteins with the highest iBAQ values from the different samples  
802 analyzed by proteomics (gel bands, solution 1, solution 2), resulting in a list of 163 non-  
803 redundant proteins (**Table S1**).



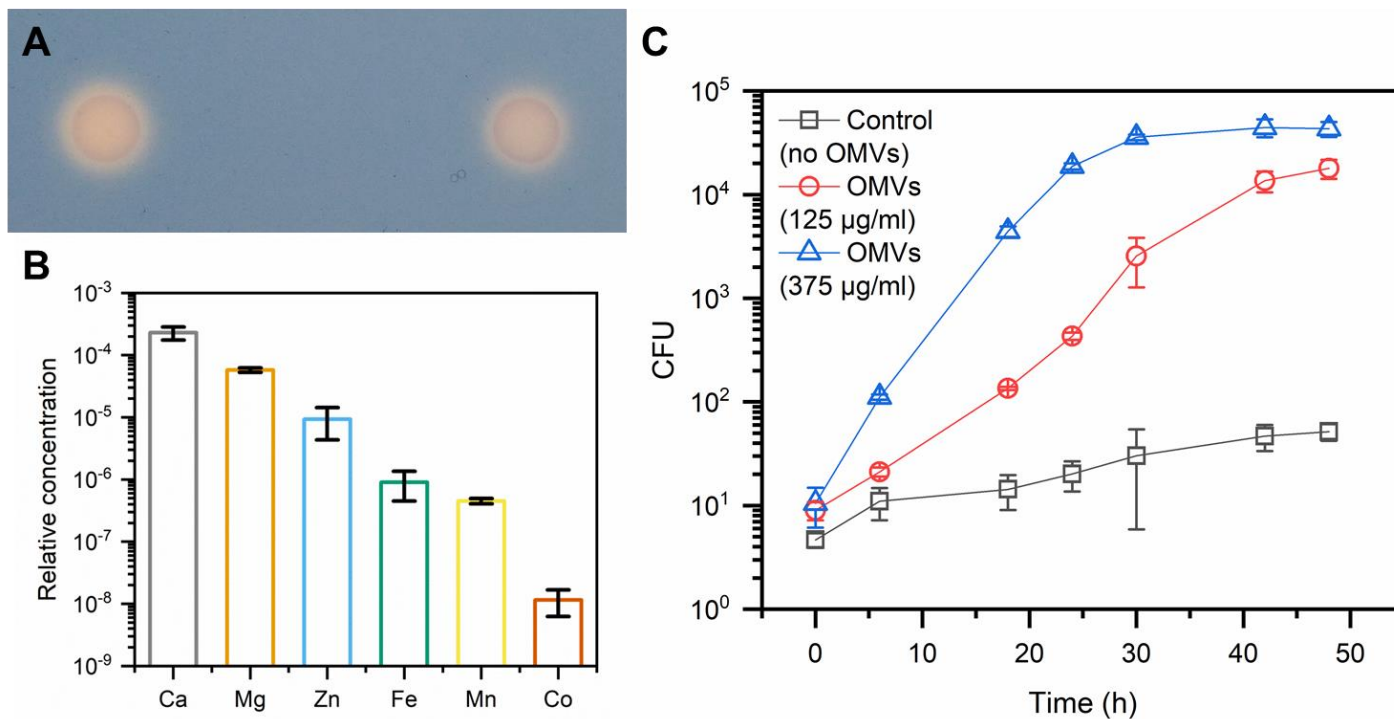

804

805 **Fig. 6.** *X. citri* OMVs carry essential metals and can be incorporated by cells.

806 Siderophores were potentially detected in the OMVs by discoloration of the medium in CAS

807 plates where vesicles were applied (A). Elemental analysis of the OMVs revealed the presence of

808 biologically important metals in the samples, including iron and zinc. The relative concentration

809 (y-axis) was calculated by the ratio between the mass fraction values for each element and the

810 carbon content. The oxidation state of each element was not determined. (B). *X. citri* can use

811 OMVs as the sole carbon source for growth, indicating that the content of the vesicles is

812 available for incorporation by cells (C). Different OMV concentrations, measured by their

813 protein content, were added to tubes with M9 medium without other carbon source and a

814 substantial increase in CFU was observed after incubation.

815

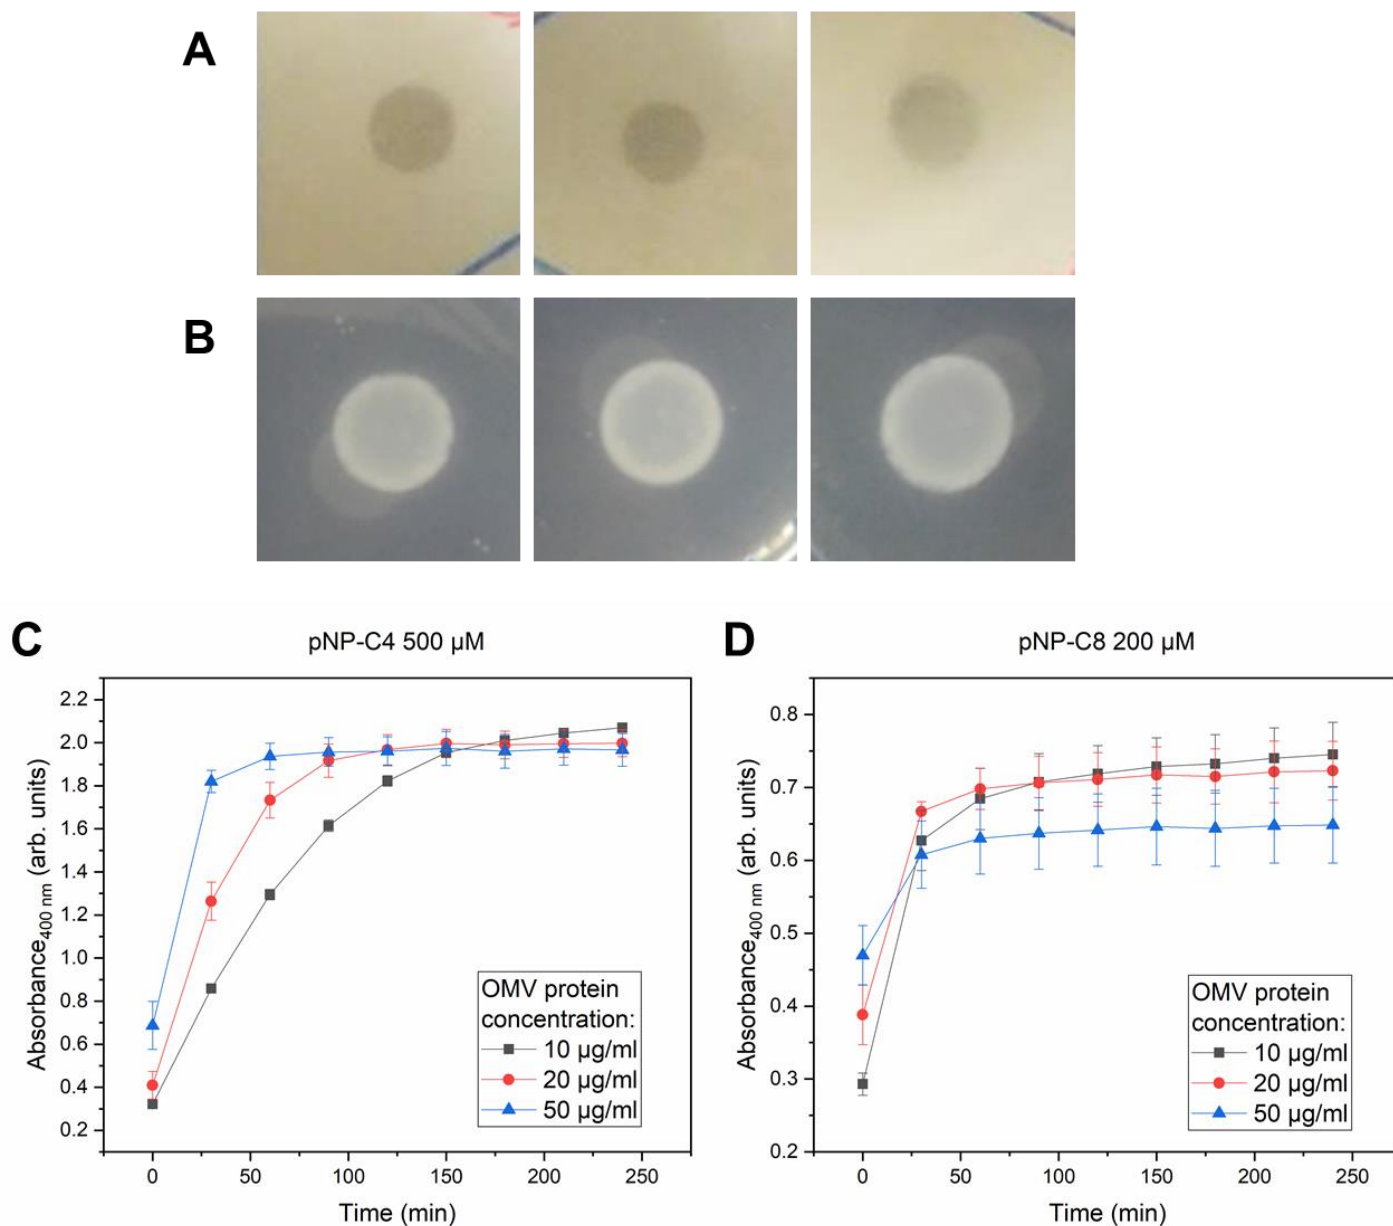

816

817 **Fig. 7.** *X. citri* OMVs present esterase activity against a broad range of substrates. In

818 qualitative esterase activity assays on agar plates, different purified OMV samples were able to

819 create a clear halo in plates emulsified with the triglyceride tributirin (A) and to generate opaque

820 white precipitates in plates containing Tween 20 and CaCl<sub>2</sub> (B). These results indicate the

821 hydrolysis of the respective substrates in the plates. Different OMV concentrations, measured by

822 their total protein content, were able to hydrolyze *p*NP-C4 (panel C) and *p*NP-C8 (panel D) in  
823 colorimetric assays, indicated by the increase in absorbance at 400 nm during incubation.  
824

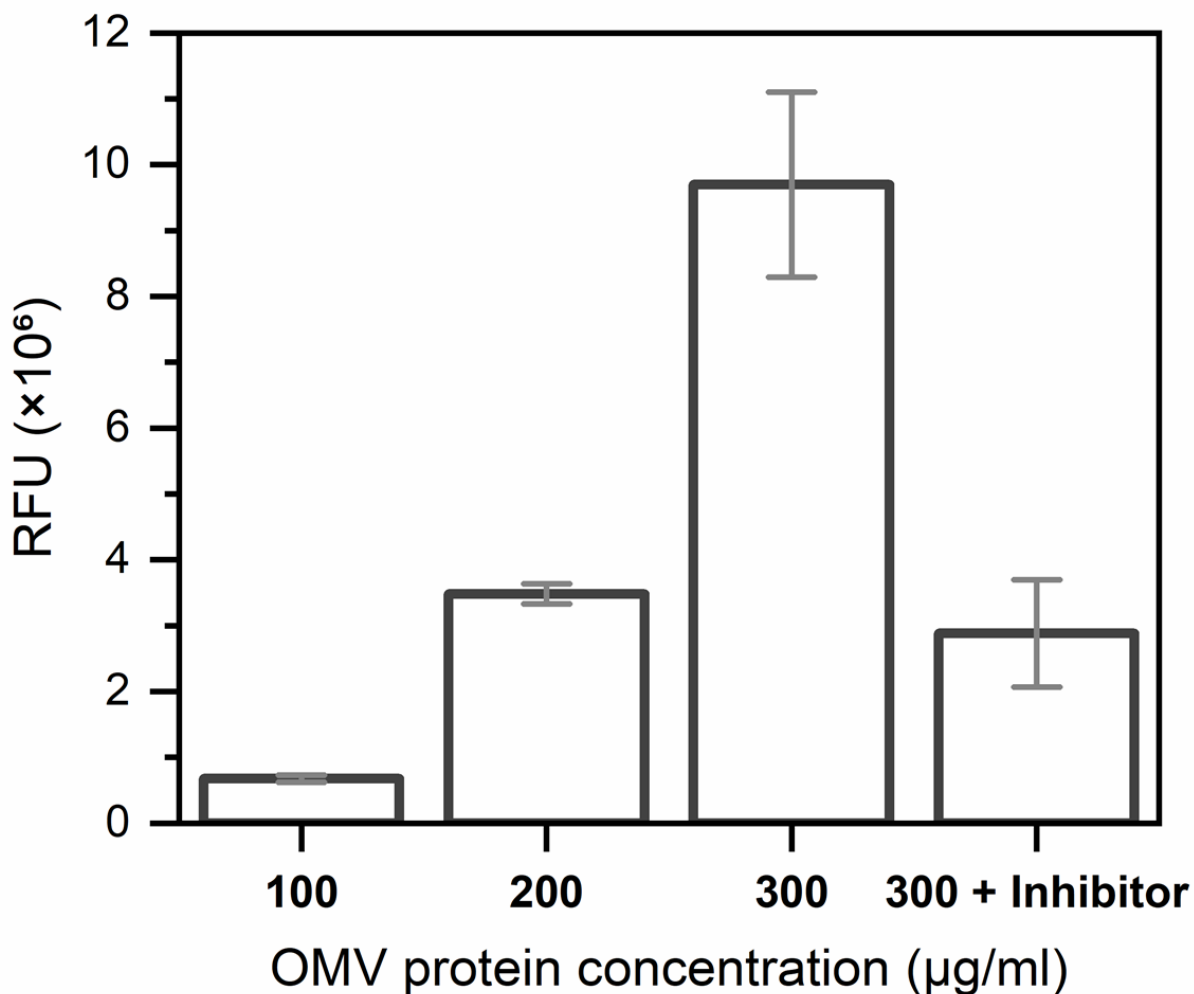

825

826 **Fig. 8.** *X. citri* OMVs present protease activity. A protease fluorescent detection kit was  
827 used to detect the activity of purified OMVs at different concentrations, measured as relative  
828 fluorescence units (RFU). Addition of an EDTA-free protease inhibitor to samples with the  
829 highest OMV concentration tested lead to substantial decrease in the observed enzymatic  
830 activity. The fluorescence from blank (phosphate buffered saline) was subtracted from all  
831 samples.

832

833           **Data Set S1.** Proteomic data for purified *X. citri* OMVs, containing details of the filtered  
834 proteins identified for the duplicate of in-solution digestions, including their iBAQ values  
835 (XLSX file).

836

837           **Data Set S2.** Proteomic data for purified *X. citri* OMVs, containing details of the filtered  
838 proteins identified for the in-gel digestion, including their iBAQ values (XLSX file).

839

840

841 **Table S1.** Combination of the top 100 most abundant proteins determined by their iBAQ  
 842 values from the different purified *X. citri* OMV samples (gel bands and a replicate of samples in  
 843 solution, **Fig. 4**), resulting in a list of 163 non-redundant proteins. UniProt annotations are  
 844 presented for each sequence.

| UniProt ID | Gene names | Locus tags | Protein names (UniProt)                                    | Pfam domains        | InterPro domains                                                       |
|------------|------------|------------|------------------------------------------------------------|---------------------|------------------------------------------------------------------------|
| Q8PRF7     |            | XAC0006    | Peptidase_M48 domain-containing protein                    | PF01435             | IPR001915                                                              |
| Q8PRF6     |            | XAC0007    | TPR_REGION domain-containing protein                       | PF13181             | IPR013026; IPR011990; IPR019734                                        |
| Q8PRF4     | exbB       | XAC0009    | Biopolymer transport ExbB protein                          | PF01618             | IPR002898                                                              |
| Q8PRE0     | ctp        | XAC0023    | Carboxyl-terminal protease                                 | PF13180;<br>PF03572 | IPR029045; IPR001478;<br>IPR036034; IPR004447;<br>IPR005151            |
| Q8PRD3     | egl        | XAC0030    | Cellulase                                                  | PF00150             | IPR001547; IPR018087;<br>IPR017853                                     |
| Q8PRC7     |            | XAC0036    | Uncharacterized protein                                    |                     |                                                                        |
| Q8PR40     | yncD       | XAC0126    | Iron transporter                                           | PF07715;<br>PF00593 | IPR039426; IPR012910;<br>IPR037066; IPR000531;<br>IPR036942            |
| Q8PQZ3     | fpvA       | XAC0176    | Ferripyoverdine receptor                                   | PF07715;<br>PF00593 | IPR012910; IPR037066;<br>IPR039423; IPR000531;<br>IPR036942; IPR010105 |
| Q8PQZ2     |            | XAC0177    | PNPLA domain-containing protein                            | PF01734             | IPR016035; IPR002641                                                   |
| Q8PQX9     |            | XAC0190    | Uncharacterized protein                                    |                     | IPR011990                                                              |
| Q8PQW2     | yojM       | XAC0209    | Superoxide dismutase [Cu-Zn] (EC 1.15.1.1)                 | PF00080             | IPR036423; IPR024134;<br>IPR018152; IPR001424                          |
| Q8PQU8     |            | XAC0223    | Uncharacterized protein                                    |                     | IPR026364; IPR023614                                                   |
| Q8PQT9     |            | XAC0232    | Uncharacterized protein                                    | PF13698             | IPR025294                                                              |
| Q8PQQ0     |            | XAC0272    | Uncharacterized protein                                    |                     |                                                                        |
| Q8PQN4     |            | XAC0289    | Uncharacterized protein                                    |                     | IPR016980; IPR029063                                                   |
| Q8NL21     | rplM       | XAC0487    | 50S ribosomal protein L13                                  | PF00572             | IPR005822; IPR005823;<br>IPR023563; IPR036899                          |
| Q8PPZ1     | groL       | XAC0542    | 60 kDa chaperonin (GroEL protein) (Protein Cpn60)          | PF00118             | IPR018370; IPR001844;<br>IPR002423; IPR027409;<br>IPR027413; IPR027410 |
| Q8PPR2     |            | XAC0623    | Uncharacterized protein                                    | PF04338             | IPR007433                                                              |
| Q8PPM3     | rplA       | XAC0663    | Endolytic peptidoglycan transglycosylase RlpA (EC 4.2.2.-) | PF03330;<br>PF05036 | IPR034718; IPR009009;<br>IPR036908; IPR012997;<br>IPR007730; IPR036680 |
| Q8PPM2     | dacC       | XAC0664    | Serine-type D-Ala-D-Ala carboxypeptidase (EC 3.4.16.4)     | PF07943;<br>PF00768 | IPR012338; IPR015956;<br>IPR018044; IPR012907;                         |

|               |      |         |                                                                                                      |                     |                                                                                                               |
|---------------|------|---------|------------------------------------------------------------------------------------------------------|---------------------|---------------------------------------------------------------------------------------------------------------|
|               |      |         |                                                                                                      |                     | IPR037167; IPR001967                                                                                          |
| <b>Q8PPK9</b> |      | XAC0677 | Uncharacterized protein                                                                              | PF10001             | IPR018718                                                                                                     |
| <b>Q8PPK4</b> |      | XAC0682 | BON domain-containing protein                                                                        | PF04972             | IPR007055; IPR014004                                                                                          |
| <b>Q8PPJ6</b> | fecA | XAC0690 | TonB-dependent receptor                                                                              | PF07715;<br>PF00593 | IPR012910; IPR037066;<br>IPR039423; IPR000531;<br>IPR036942                                                   |
| <b>Q8PPH0</b> | fyuA | XAC0716 | TonB-dependent receptor                                                                              | PF07715;<br>PF00593 | IPR012910; IPR037066;<br>IPR000531; IPR036942;<br>IPR010104                                                   |
| <b>Q8PPD9</b> |      | XAC0747 | Uncharacterized protein                                                                              |                     | IPR023614                                                                                                     |
| <b>Q8PPC1</b> |      | XAC0765 | Uncharacterized protein                                                                              | PF04348             | IPR007443; IPR028082                                                                                          |
| <b>Q8PP23</b> | surA | XAC0865 | Chaperone SurA (Peptidyl-prolyl cis-trans isomerase SurA) (PPIase SurA) (EC 5.2.1.8) (Rotamase SurA) | PF00639;<br>PF09312 | IPR000297; IPR023034;<br>IPR015391; IPR027304                                                                 |
| <b>Q8PP00</b> | gfo  | XAC0888 | Glucose-fructose oxidoreductase                                                                      | PF01408;<br>PF02894 | IPR004104; IPR008354;<br>IPR036291; IPR000683                                                                 |
| <b>Q8PNT4</b> | rplK | XAC0961 | 50S ribosomal protein L11                                                                            | PF00298;<br>PF03946 | IPR000911; IPR036796;<br>IPR006519; IPR020783;<br>IPR036769; IPR020785;<br>IPR020784                          |
| <b>Q8PNS2</b> | rplW | XAC0974 | 50S ribosomal protein L23                                                                            | PF00276             | IPR012677; IPR012678;<br>IPR013025                                                                            |
| <b>Q8PNS1</b> | rplB | XAC0975 | 50S ribosomal protein L2                                                                             | PF00181;<br>PF03947 | IPR012340; IPR022666;<br>IPR014722; IPR002171;<br>IPR005880; IPR022669;<br>IPR022671; IPR014726;<br>IPR008991 |
| <b>Q8NKY0</b> | rplV | XAC0977 | 50S ribosomal protein L22                                                                            | PF00237             | IPR001063; IPR018260;<br>IPR036394; IPR005727                                                                 |
| <b>Q8PNR8</b> | rplP | XAC0979 | 50S ribosomal protein L16                                                                            | PF00252             | IPR016180; IPR036920;<br>IPR000114; IPR020798                                                                 |
| <b>Q8NL02</b> | rplN | XAC0982 | 50S ribosomal protein L14                                                                            | PF00238             | IPR036853; IPR000218;<br>IPR005745; IPR019972                                                                 |
| <b>Q8PNR4</b> | rplE | XAC0984 | 50S ribosomal protein L5                                                                             | PF00281;<br>PF00673 | IPR002132; IPR020930;<br>IPR031309; IPR020929;<br>IPR022803; IPR031310                                        |
| <b>Q8PNR3</b> | rpsH | XAC0986 | 30S ribosomal protein S8                                                                             | PF00410             | IPR000630; IPR035987                                                                                          |
| <b>Q8PNR1</b> | rplR | XAC0988 | 50S ribosomal protein L18                                                                            | PF00861             | IPR005484; IPR004389                                                                                          |
| <b>Q8PNR0</b> | rpmD | XAC0990 | 50S ribosomal protein L30                                                                            | PF00327             | IPR036919; IPR005996;<br>IPR016082                                                                            |
| <b>Q8PNQ9</b> | rplO | XAC0991 | 50S ribosomal protein L15                                                                            | PF00828             | IPR036227; IPR030878;<br>IPR005749; IPR001196;<br>IPR021131                                                   |
| <b>Q8NKX3</b> | rpsM | XAC0993 | 30S ribosomal protein S13                                                                            | PF00416             | IPR027437; IPR001892;<br>IPR010979; IPR019980;<br>IPR018269                                                   |

|               |      |         |                                                           |                                 |                                                                                                               |
|---------------|------|---------|-----------------------------------------------------------|---------------------------------|---------------------------------------------------------------------------------------------------------------|
| <b>P0A0Y0</b> | rpsD | XAC0995 | 30S ribosomal protein S4                                  | PF00163;<br>PF01479             | IPR022801; IPR001912;<br>IPR005709; IPR018079;<br>IPR002942; IPR036986                                        |
| <b>Q8PNQ7</b> | rplQ | XAC0997 | 50S ribosomal protein L17                                 | PF01196                         | IPR000456; IPR036373                                                                                          |
| <b>Q8PNP2</b> | mopB | XAC1012 | Outer membrane protein                                    | PF13505;<br>PF00691             | IPR011250; IPR027385;<br>IPR006664; IPR006665;<br>IPR036737; IPR028974                                        |
| <b>Q8PNJ7</b> |      | XAC1062 | Uncharacterized protein                                   |                                 |                                                                                                               |
| <b>Q8PNF8</b> | slp  | XAC1113 | Outer membrane protein Slp                                | PF03843                         | IPR004658                                                                                                     |
| <b>Q8PND0</b> | fyuA | XAC1143 | TonB-dependent receptor                                   | PF07715;<br>PF00593             | IPR012910; IPR039423;<br>IPR000531; IPR036942                                                                 |
| <b>Q8PNB0</b> |      | XAC1163 | Uncharacterized protein                                   |                                 |                                                                                                               |
| <b>Q8PN49</b> | minE | XAC1224 | Cell division topological specificity factor              | PF03776                         | IPR005527; IPR036707                                                                                          |
| <b>Q8PN43</b> |      | XAC1230 | Uncharacterized protein                                   |                                 | IPR011256                                                                                                     |
| <b>Q8PN35</b> |      | XAC1238 | Endo/exonuclease/phosphatase domain-containing protein    | PF03372                         | IPR036691; IPR005135                                                                                          |
| <b>Q8PN33</b> |      | XAC1240 | Uncharacterized protein                                   | PF13202;<br>PF13499             | IPR011992; IPR018247;<br>IPR002048                                                                            |
| <b>Q8PN25</b> | rplU | XAC1248 | 50S ribosomal protein L21                                 | PF00829                         | IPR036164; IPR028909;<br>IPR001787; IPR018258                                                                 |
| <b>Q8PMV4</b> | mucD | XAC1321 | Periplasmic serine endoprotease DegP-like (EC 3.4.21.107) | PF13180                         | IPR001478; IPR036034;<br>IPR011782; IPR009003;<br>IPR001940                                                   |
| <b>Q8PMV1</b> |      | XAC1324 | Uncharacterized protein                                   | PF16137                         | IPR032314                                                                                                     |
| <b>Q8PMS7</b> |      | XAC1349 | Serine protease                                           | PF03797;<br>PF12951;<br>PF00082 | IPR005546; IPR036709;<br>IPR013425; IPR000209;<br>IPR036852; IPR023827;<br>IPR023828; IPR015500;<br>IPR034061 |
| <b>Q8PMP7</b> |      | XAC1379 | Uncharacterized protein                                   | PF10099                         | IPR018764                                                                                                     |
| <b>Q8PMM9</b> |      | XAC1397 | Alginate_exp domain-containing protein                    | PF13372                         | IPR025388                                                                                                     |
| <b>Q8PML3</b> | oma  | XAC1413 | Outer membrane protein assembly factor BamA               | PF01103;<br>PF07244             | IPR000184; IPR010827;<br>IPR039910; IPR023707;<br>IPR034746                                                   |
| <b>Q8PMJ3</b> |      | XAC1434 | CASH domain-containing protein                            | PF13229                         | IPR039448; IPR006633;<br>IPR022441; IPR006626;<br>IPR012334; IPR011050                                        |
| <b>Q8PMJ2</b> | fhuA | XAC1435 | Iron receptor                                             | PF07715;<br>PF00593             | IPR012910; IPR037066;<br>IPR039423; IPR000531;<br>IPR036942; IPR010917;<br>IPR010105                          |
| <b>Q8PMH2</b> | dcp  | XAC1456 | Peptidyl-dipeptidase                                      | PF01432                         | IPR034005; IPR024077;<br>IPR001567                                                                            |
| <b>Q8PMG5</b> |      | XAC1463 | Phospholipase A1 (EC 3.1.1.32) (EC                        | PF02253                         | IPR003187; IPR036541                                                                                          |



|               |      |         | 3.1.1.4) (Phosphatidylcholine 1-acylhydrolase)      |                     |                                                             |
|---------------|------|---------|-----------------------------------------------------|---------------------|-------------------------------------------------------------|
| <b>Q8PMG3</b> | pcp  | XAC1466 | Peptidoglycan-associated outer membrane lipoprotein | PF05433             | IPR008816                                                   |
| <b>Q8PMF0</b> |      | XAC1479 | OmpA family protein                                 | PF13488;<br>PF00691 | IPR039567; IPR006664;<br>IPR006665; IPR006690;<br>IPR036737 |
| <b>Q8PMD2</b> |      | XAC1497 | Uncharacterized protein                             |                     |                                                             |
| <b>Q8PMB6</b> | smpA | XAC1516 | Outer membrane protein assembly factor BamE         | PF04355             | IPR026592; IPR037873;<br>IPR007450                          |
| <b>Q8PM83</b> | btuE | XAC1549 | Glutathione peroxidase                              | PF00255             | IPR000889; IPR029759;<br>IPR036249                          |
| <b>Q8PM82</b> | fkpA | XAC1550 | Peptidyl-prolyl cis-trans isomerase (EC 5.2.1.8)    | PF00254;<br>PF01346 | IPR001179; IPR000774;<br>IPR036944                          |
| <b>Q8PM54</b> | oprO | XAC1579 | Polyphosphate-selective porin O                     | PF07396             | IPR023614; IPR010870                                        |
| <b>Q8NL26</b> |      | XAC1585 | Peptidyl-prolyl cis-trans isomerase (EC 5.2.1.8)    | PF00254;<br>PF01346 | IPR001179; IPR000774;<br>IPR036944                          |
| <b>Q8PM13</b> | rpsR | XAC1621 | 30S ribosomal protein S18                           | PF01084             | IPR001648; IPR018275;<br>IPR036870                          |
| <b>Q8PLS7</b> |      | XAC1712 | DUF218 domain-containing protein                    | PF02698             | IPR003848; IPR014729                                        |
| <b>Q8PLR1</b> | nlpD | XAC1728 | Lipoprotein                                         | PF01476;<br>PF01551 | IPR011055; IPR018392;<br>IPR036779; IPR016047               |
| <b>Q8PLN4</b> |      | XAC1761 | Uncharacterized protein                             |                     |                                                             |
| <b>Q8PL93</b> | cirA | XAC1910 | TonB-dependent receptor                             | PF07715;<br>PF00593 | IPR012910; IPR037066;<br>IPR000531; IPR010104               |
| <b>Q8PKZ8</b> | lolA | XAC2008 | Outer-membrane lipoprotein carrier protein          | PF03548             | IPR029046; IPR004564;<br>IPR018323                          |
| <b>Q8PKZ0</b> | pilF | XAC2017 | Fimbrial biogenesis protein                         |                     | IPR013360; IPR013026;<br>IPR011990; IPR019734               |
| <b>Q8PKY7</b> | bamB | XAC2020 | Outer membrane protein assembly factor BamB         | PF13360             | IPR017687; IPR018391;<br>IPR002372; IPR011047;<br>IPR015943 |
| <b>Q8PK64</b> |      | XAC2312 | TonB_dep_Rec domain-containing protein              | PF00593             | IPR039426; IPR013784;<br>IPR000531                          |
| <b>Q8PK57</b> |      | XAC2319 | Uncharacterized protein                             |                     |                                                             |
| <b>Q8PK24</b> |      | XAC2353 | Uncharacterized protein                             |                     |                                                             |
| <b>Q8PJM6</b> | rpfN | XAC2504 | Porin                                               | PF04966             | IPR007049; IPR038673                                        |
| <b>Q8PJK8</b> | ggt  | XAC2523 | Gamma-glutamyltranspeptidase                        |                     | IPR043138; IPR000101;<br>IPR043137; IPR029055               |
| <b>Q8PJK6</b> |      | XAC2525 | Uncharacterized protein                             |                     |                                                             |
| <b>Q8PJK0</b> | btuB | XAC2531 | TonB-dependent receptor                             | PF07715;<br>PF00593 | IPR012910; IPR037066;<br>IPR000531; IPR010916               |
| <b>Q8PJH0</b> |      | XAC2562 | Uncharacterized protein                             |                     |                                                             |
| <b>Q8PJE3</b> | rplT | XAC2591 | 50S ribosomal protein L20                           | PF00453             | IPR005813; IPR035566                                        |
| <b>Q8PJD5</b> | btuB | XAC2600 | TonB-dependent receptor                             | PF07715             | IPR012910; IPR037066;<br>IPR010104; IPR010917               |

|               |       |         |                                   |                  |                                                                             |
|---------------|-------|---------|-----------------------------------|------------------|-----------------------------------------------------------------------------|
| <b>Q8PJC4</b> |       | XAC2611 | DUF4189 domain-containing protein | PF13827          | IPR025240                                                                   |
| <b>Q8PJB5</b> | virB9 | XAC2620 | VirB9 protein                     | PF03524          | IPR010258; IPR033645; IPR038161                                             |
| <b>Q8PJ70</b> | oar   | XAC2672 | Oar protein                       |                  | IPR039426; IPR008969; IPR036942                                             |
| <b>Q8PJ58</b> | rpsO  | XAC2684 | 30S ribosomal protein S15         | PF00312          | IPR000589; IPR005290; IPR009068                                             |
| <b>Q8PJ03</b> | btuB  | XAC2742 | TonB-dependent receptor           | PF07715; PF00593 | IPR012910; IPR037066; IPR000531; IPR010917                                  |
| <b>Q8PJ02</b> | oar   | XAC2743 | Oar protein                       | PF07715; PF00593 | IPR039426; IPR013784; IPR012910; IPR037066; IPR000531                       |
| <b>Q8PIY6</b> | phoA  | XAC2759 | Alkaline phosphatase              | PF00245          | IPR001952; IPR017850                                                        |
| <b>Q8PIX3</b> | bp26  | XAC2772 | Outer membrane protein            | PF04402          | IPR007497                                                                   |
| <b>Q8PIX2</b> | oar   | XAC2773 | Oar protein                       | PF07715; PF00593 | IPR039426; IPR013784; IPR012910; IPR037066; IPR000531                       |
| <b>Q8PIW5</b> | rlpB  | XAC2780 | LPS-assembly lipoprotein LptE     | PF04390          | IPR007485                                                                   |
| <b>Q8PIU4</b> |       | XAC2801 | Uncharacterized protein           | PF06629          | IPR010583                                                                   |
| <b>Q8PIR6</b> | phuR  | XAC2829 | Outer membrane hemin receptor     | PF07715; PF00593 | IPR039426; IPR012910; IPR037066; IPR000531; IPR036942                       |
| <b>Q8PIF7</b> | fhuA  | XAC2941 | TonB-dependent receptor           | PF07715; PF00593 | IPR012910; IPR037066; IPR039423; IPR000531; IPR036942; IPR010105            |
| <b>Q8PIF2</b> |       | XAC2946 | Uncharacterized protein           | PF10670          | IPR019613                                                                   |
| <b>Q8PIE7</b> | comEA | XAC2951 | DNA transport competence protein  |                  | IPR004509; IPR010994                                                        |
| <b>Q8PIE0</b> |       | XAC2958 | Uncharacterized protein           | PF09839          | IPR018642                                                                   |
| <b>Q8PID5</b> |       | XAC2963 | Uncharacterized protein           | PF11306          | IPR021457                                                                   |
| <b>Q8PI48</b> | btuB  | XAC3050 | TonB-dependent receptor           | PF07715; PF00593 | IPR012910; IPR037066; IPR000531; IPR036942                                  |
| <b>Q8PI41</b> | bla   | XAC3057 | Beta-lactamase                    | PF00144          | IPR001466; IPR012338                                                        |
| <b>Q8PI27</b> | iroN  | XAC3071 | TonB-dependent receptor           | PF07715; PF00593 | IPR012910; IPR037066; IPR000531; IPR010104                                  |
| <b>Q8PHZ0</b> |       | XAC3108 | Uncharacterized protein           |                  | IPR011990                                                                   |
| <b>Q8PHV9</b> | cpoB  | XAC3140 | Cell division coordinator CpoB    | PF16331; PF13525 | IPR039565; IPR034706; IPR014162; IPR013026; IPR011990; IPR019734; IPR032519 |
| <b>Q8PHV8</b> | ompP6 | XAC3141 | Peptidoglycan-associated protein  | PF00691          | IPR006664; IPR006665; IPR036737; IPR039001; IPR014169                       |
| <b>Q8PHV7</b> | tolB  | XAC3142 | Tol-Pal system protein TolB       | PF07676; PF04052 | IPR011042; IPR011659; IPR014167; IPR007195; IPR036752                       |
| <b>Q8PHV5</b> | tolR  | XAC3144 | Tol-Pal system protein TolR       | PF02472          | IPR003400; IPR014168                                                        |

|               |       |         |                                                    |                  |                                                                  |
|---------------|-------|---------|----------------------------------------------------|------------------|------------------------------------------------------------------|
| <b>Q8PHV4</b> | tolQ  | XAC3145 | Tol-Pal system protein TolQ                        | PF01618          | IPR002898; IPR014163                                             |
| <b>Q8PHU4</b> |       | XAC3155 | Uncharacterized protein                            | PF11218          | IPR021381                                                        |
| <b>Q8PHT7</b> | bla   | XAC3162 | Beta-lactamase (EC 3.5.2.6)                        |                  | IPR012338; IPR000871; IPR023650; IPR006311                       |
| <b>Q8PHT1</b> | bfeA  | XAC3168 | Ferric enterobactin receptor                       | PF07715; PF00593 | IPR012910; IPR037066; IPR000531; IPR010916; IPR036942            |
| <b>Q8PHT0</b> | bfeA  | XAC3169 | Ferric enterobactin receptor                       | PF07715; PF00593 | IPR012910; IPR037066; IPR000531; IPR036942                       |
| <b>Q8PHS3</b> | fecA  | XAC3176 | Citrate-dependent iron transporter                 | PF07715; PF00593 | IPR012910; IPR037066; IPR000531; IPR036942; IPR010105            |
| <b>Q8PHQ5</b> | btuB  | XAC3194 | Outer membrane receptor for transport of vitamin B | PF07715; PF00593 | IPR010101; IPR039426; IPR012910; IPR037066; IPR000531; IPR036942 |
| <b>Q8PHP1</b> | bfeA  | XAC3207 | Ferric enterobactin receptor                       | PF07715; PF00593 | IPR012910; IPR037066; IPR000531; IPR010916; IPR036942            |
| <b>Q8PHN1</b> | comL  | XAC3218 | Outer membrane protein assembly factor BamD        | PF13525          | IPR017689; IPR039565; IPR013026; IPR011990                       |
| <b>Q8PHL0</b> | fimA  | XAC3241 | Fimbrillin                                         | PF07963; PF00114 | IPR012902; IPR001082                                             |
| <b>Q8PHF7</b> | estA  | XAC3300 | Lipase                                             | PF03797; PF00657 | IPR005546; IPR036709; IPR001087; IPR017186; IPR036514            |
| <b>Q8PHE6</b> | iroN  | XAC3311 | TonB-dependent receptor                            | PF07715; PF00593 | IPR012910; IPR037066; IPR006311; IPR000531; IPR036942; IPR010104 |
| <b>Q8PHC5</b> | fecA  | XAC3334 | TonB-dependent receptor                            | PF07715; PF00593 | IPR039426; IPR012910; IPR037066; IPR000531; IPR036942            |
| <b>Q8PHA8</b> |       | XAC3351 | Uncharacterized protein                            |                  |                                                                  |
| <b>Q8PHA5</b> | ompW  | XAC3354 | Outer membrane protein W                           | PF03922          | IPR011250; IPR005618                                             |
| <b>Q8PHA4</b> | omp21 | XAC3355 | Outer membrane protein                             | PF03922          | IPR011250; IPR005618                                             |
| <b>Q8PH89</b> | fhuE  | XAC3370 | Outer membrane receptor for ferric iron uptake     | PF07715; PF00593 | IPR012910; IPR037066; IPR039423; IPR000531; IPR036942; IPR010105 |
| <b>Q8PH16</b> | btuB  | XAC3444 | TonB-dependent receptor                            | PF07715; PF00593 | IPR012910; IPR037066; IPR000531; IPR036942                       |
| <b>Q8PGZ9</b> | tolC  | XAC3463 | TolC protein                                       | PF02321          | IPR003423; IPR010130                                             |
| <b>Q8PGZ0</b> | oprO  | XAC3472 | Polyphosphate-selective porin O                    | PF07396          | IPR023614; IPR010870                                             |
| <b>Q8PGX3</b> | fyuA  | XAC3489 | TonB-dependent receptor                            | PF07715; PF00593 | IPR012910; IPR037066; IPR039423; IPR000531; IPR036942            |
| <b>Q8PGW4</b> | fhuE  | XAC3498 | Outer membrane receptor for ferric iron uptake     | PF07715; PF00593 | IPR012910; IPR037066; IPR039423; IPR000531;                      |

|               |       |          |                                                                 |                     |                                                                                      |
|---------------|-------|----------|-----------------------------------------------------------------|---------------------|--------------------------------------------------------------------------------------|
|               |       |          |                                                                 |                     | IPR036942; IPR010917;<br>IPR010105                                                   |
| <b>Q8PGU1</b> |       | XAC3525  | Uncharacterized protein                                         |                     |                                                                                      |
| <b>Q8PGL1</b> | uptE  | XAC3605  | Outer membrane protein                                          |                     | IPR036737                                                                            |
| <b>Q8PGL0</b> | uptD  | XAC3606  | Outer membran protein                                           | PF14346             | IPR025511                                                                            |
| <b>Q8PGJ6</b> | pfeA  | XAC3620  | Siderophore receptor protein                                    | PF07715;<br>PF00593 | IPR039426; IPR012910;<br>IPR037066; IPR000531;<br>IPR036942; IPR010917;<br>IPR010105 |
| <b>Q8PGG6</b> | atpG  | XAC3650  | ATP synthase gamma chain (ATP synthase F1 sector gamma subunit) | PF00231             | IPR035968; IPR000131;<br>IPR023632                                                   |
| <b>Q8PGG0</b> |       | XAC3657  | Uncharacterized protein                                         |                     | IPR011250                                                                            |
| <b>Q8PGF7</b> |       | XAC3660  | Uncharacterized protein                                         |                     |                                                                                      |
| <b>Q8PGF3</b> | ompW  | XAC3664  | Outer membrane protein                                          | PF03922             | IPR011250; IPR005618                                                                 |
| <b>Q8PGF0</b> |       | XAC3667  | Lipoprotein                                                     | PF03180             | IPR004872                                                                            |
| <b>Q8PGC9</b> | dadA  | XAC3688  | D-amino acid dehydrogenase (EC 1.4.99.-)                        | PF01266             | IPR023080; IPR006076;<br>IPR036188                                                   |
| <b>Q8PFX5</b> | amaA  | XAC3847  | N-acyl-L-amino acid amidohydrolase                              | PF07687;<br>PF01546 | IPR017439; IPR036264;<br>IPR002933; IPR011650                                        |
| <b>Q8PFW2</b> |       | XAC3860  | N-acetylmuramoyl-L-alanine amidase                              | PF01510             | IPR036505; IPR002502                                                                 |
| <b>Q8PFV4</b> | yliI  | XAC3868  | Dehydrogenase                                                   | PF07995             | IPR011042; IPR012938;<br>IPR011041                                                   |
| <b>P66535</b> | rpsU  | XAC3872  | 30S ribosomal protein S21                                       | PF01165             | IPR001911; IPR018278;<br>IPR038380                                                   |
| <b>Q8PFR1</b> |       | XAC3917  | SPOR domain-containing protein                                  | PF05036             | IPR007730; IPR036680                                                                 |
| <b>Q8PFQ2</b> |       | XAC3926  | OMP_b-brl domain-containing protein                             | PF13505             | IPR011250; IPR027385                                                                 |
| <b>Q8PFK1</b> | htrA  | XAC3980  | Periplasmic serine endoprotease DegP-like (EC 3.4.21.107)       | PF13180             | IPR001478; IPR036034;<br>IPR011782; IPR009003;<br>IPR001940                          |
| <b>Q8PFK0</b> |       | XAC3981  | Uncharacterized protein                                         |                     |                                                                                      |
| <b>Q8PFH3</b> | ecnA  | XAC4008  | Entericidin A                                                   | PF08085             | IPR012556                                                                            |
| <b>Q8PFD5</b> | iroN  | XAC4048  | TonB-dependent receptor                                         | PF07715;<br>PF00593 | IPR012910; IPR037066;<br>IPR000531; IPR010104                                        |
| <b>P66160</b> | rpmB  | XAC4159  | 50S ribosomal protein L28                                       | PF00830             | IPR034704; IPR026569;<br>IPR037147; IPR001383                                        |
| <b>Q8PEX1</b> |       | XAC4219  | Ysc84 domain-containing protein                                 | PF04366             | IPR007461                                                                            |
| <b>Q8PER7</b> |       | XAC4273  | OmpA-related protein                                            | PF00593             | IPR039426; IPR013784;<br>IPR000531                                                   |
| <b>Q8PER6</b> |       | XAC4274  | OmpA-related protein                                            | PF00593             | IPR039426; IPR013784;<br>IPR000531                                                   |
| <b>Q8PEK7</b> | yrbC  | XAC4342  | Toluene tolerance protein                                       | PF05494             | IPR008869; IPR042245                                                                 |
| <b>Q8PEK5</b> | vacJ  | XAC4344  | Lipoprotein                                                     | PF04333             | IPR007428                                                                            |
| <b>Q8PRJ3</b> | virB9 | XACb0039 | VirB9 protein                                                   | PF03524             | IPR010258; IPR014148;<br>IPR033645; IPR038161                                        |
| <b>Q8NL05</b> | rpsN  |          | 30S ribosomal protein S14                                       | PF00253             | IPR001209; IPR043140;<br>IPR023036                                                   |

845 **Table S2.** Results from the TQ ICP-MS elemental analysis of samples containing  
 846 purified OMV suspended in PBS. The data for **Fig. 6B** were obtained by subtracting the  
 847 background concentration of each element in PBS and normalizing the values for each sample  
 848 based on their respective carbon content. See also **Table S3** and **Table S4** for experimental  
 849 details. LOD: limit of detection.

| Element | Buffer PBS 1× | Sample 1      | Sample 2      | Sample 3      | LOD   | Unit               |
|---------|---------------|---------------|---------------|---------------|-------|--------------------|
| C       | < LOD         | 776 ± 13      | 1285 ± 3      | 899 ± 2       | 24.8  | mg L <sup>-1</sup> |
| Mg      | < LOD         | 41.4 ± 0.6    | 80.6 ± 1.0    | 51.2 ± 1.0    | 0.295 | µg L <sup>-1</sup> |
| S       | 80 ± 1        | 112 ± 2       | 152 ± 3       | 113 ± 2       | 0.473 | µg L <sup>-1</sup> |
| Ca      | 47 ± 1        | 273 ± 3       | 292 ± 10      | 232 ± 6       | 6.782 | µg L <sup>-1</sup> |
| Mn      | 0.09 ± 0.01   | 0.43 ± 0.01   | 0.62 ± 0.03   | 0.54 ± 0.01   | 0.007 | µg L <sup>-1</sup> |
| Fe      | 1.58 ± 0.14   | 2.13 ± 0.03   | 2.32 ± 0.10   | 2.85 ± 0.14   | 0.196 | µg L <sup>-1</sup> |
| Co      | 0.044 ± 0.003 | 0.053 ± 0.005 | 0.052 ± 0.003 | 0.059 ± 0.006 | 0.001 | µg L <sup>-1</sup> |
| Ni      | 0.48 ± 0.02   | 3.08 ± 0.09   | 0.96 ± 0.06   | 0.97 ± 0.10   | 0.154 | µg L <sup>-1</sup> |
| Cu      | < LOD         | 0.132 ± 0.002 | < LOD         | < LOD         | 0.037 | µg L <sup>-1</sup> |
| Zn      | 1.06 ± 0.03   | 6.97 ± 0.10   | 8.04 ± 0.15   | 14.57 ± 0.12  | 0.175 | µg L <sup>-1</sup> |
| Br      | 153 ± 8       | 136 ± 14      | 149 ± 11      | 138 ± 7       | 0.042 | µg L <sup>-1</sup> |
| Se      | < LOD         | < LOD         | 0.004 ± 0.001 | < LOD         | 0.002 | µg L <sup>-1</sup> |
| Ba      | 1.01 ± 0.03   | 1.15 ± 0.01   | 1.49 ± 0.02   | 1.27 ± 0.02   | 0.003 | µg L <sup>-1</sup> |

850

851 **Table S3.** Mass values defined in the quadrupoles for the TQ ICP-MS elemental analysis.

| Element | Isotope | Analysis Mode | Q <sub>1</sub> mass | Q <sub>2</sub> filled with | Q <sub>3</sub> mass                                                     | LOD   | Unit               | Linear Range | Sensitivity (cps L μg <sup>-1</sup> ) | R <sup>2</sup> |
|---------|---------|---------------|---------------------|----------------------------|-------------------------------------------------------------------------|-------|--------------------|--------------|---------------------------------------|----------------|
| C       | 12      | SQ - KED      | ---                 | Helium                     | 12                                                                      | 24.8  | mg L <sup>-1</sup> | 50 - 1500    | 3.0 × 10 <sup>2</sup>                 | 0.9999         |
| Mg      | 24      | SQ - KED      | ---                 | Helium                     | 24                                                                      | 0.295 | μg L <sup>-1</sup> | 25 - 100     | 6.3 × 10 <sup>2</sup>                 | 0.9924         |
| S       | 32      | TQ - O2       | 32                  | Oxygen                     | <sup>48</sup> <sub>(<sup>32</sup>S.<sup>16</sup>O<sup>+</sup>)</sub>    | 0.473 | μg L <sup>-1</sup> | 3 - 160      | 1.9 × 10 <sup>3</sup>                 | 0.9987         |
| Ca      | 44      | SQ - KED      | ---                 | Helium                     | 44                                                                      | 6.782 | μg L <sup>-1</sup> | 25 - 500     | 4.5 × 10 <sup>1</sup>                 | 0.9997         |
| Mn      | 55      | SQ - KED      | ---                 | Helium                     | 55                                                                      | 0.007 | μg L <sup>-1</sup> | 0.01 - 5     | 9.2 × 10 <sup>3</sup>                 | 0.9999         |
| Fe      | 57      | SQ - KED      | ---                 | Helium                     | 57                                                                      | 0.196 | μg L <sup>-1</sup> | 0.25 - 5     | 4.1 × 10 <sup>2</sup>                 | 0.9977         |
| Co      | 59      | SQ - KED      | ---                 | Helium                     | 59                                                                      | 0.001 | μg L <sup>-1</sup> | 0.01 - 1     | 3.8 × 10 <sup>4</sup>                 | 0.9993         |
| Ni      | 60      | SQ - KED      | ---                 | Helium                     | 60                                                                      | 0.154 | μg L <sup>-1</sup> | 0.25 - 10    | 1.2 × 10 <sup>4</sup>                 | 0.9939         |
| Cu      | 63      | SQ - KED      | ---                 | Helium                     | 63                                                                      | 0.037 | μg L <sup>-1</sup> | 0.05 - 10    | 3.1 × 10 <sup>4</sup>                 | 0.9999         |
| Zn      | 66      | SQ - KED      | ---                 | Helium                     | 66                                                                      | 0.175 | μg L <sup>-1</sup> | 0.25 - 25    | 4.1 × 10 <sup>3</sup>                 | 0.9997         |
| Br      | 79      | TQ - O2       | 79                  | Oxygen                     | <sup>95</sup> <sub>(<sup>79</sup>Br.<sup>16</sup>O<sup>+</sup>)</sub>   | 0.042 | μg L <sup>-1</sup> | 50 - 500     | 3.6 × 10 <sup>2</sup>                 | 0.9999         |
| Se      | 80      | TQ - O2       | 80                  | Oxygen                     | <sup>96</sup> <sub>(<sup>80</sup>Se.<sup>16</sup>O<sup>+</sup>)</sub>   | 0.002 | μg L <sup>-1</sup> | 0.005 - 1    | 2.1 × 10 <sup>3</sup>                 | 0.9993         |
| Ba      | 138     | TQ - O2       | 138                 | Oxygen                     | <sup>154</sup> <sub>(<sup>138</sup>Ba.<sup>16</sup>O<sup>+</sup>)</sub> | 0.003 | μg L <sup>-1</sup> | 0.05 - 5     | 5.2 × 10 <sup>4</sup>                 | 0.9999         |

852

853

854

**Table S4.** TQ ICP-MS operating conditions.

|                                                      |                                             |
|------------------------------------------------------|---------------------------------------------|
| <b>RF Power (W)</b>                                  | <b>1550</b>                                 |
| <b>Argon coolant gas flow (L min<sup>-1</sup>)</b>   | 14                                          |
| <b>Argon auxiliary gas flow (L min<sup>-1</sup>)</b> | 0.8                                         |
| <b>Argon nebulizer flow (L min<sup>-1</sup>)</b>     | 1.04                                        |
| <b>He flow gas (mL min<sup>-1</sup>)</b>             | 6.57                                        |
| <b>O<sub>2</sub> flow gas (mL min<sup>-1</sup>)</b>  | 0.6                                         |
| <b>Nebulizer</b>                                     | MicroMist U-Series 0.4 mL min <sup>-1</sup> |
| <b>Spray Chamber</b>                                 | Glass Cyclonic spray chamber                |
| <b>Peristaltic Pump (rpm)</b>                        | 40                                          |
| <b>Spray chamber temperature (°C)</b>                | 2.7                                         |
| <b>Dwell time (s)</b>                                | 0.1                                         |
| <b>Number of Sweeps</b>                              | 10                                          |

855

**SB broth**

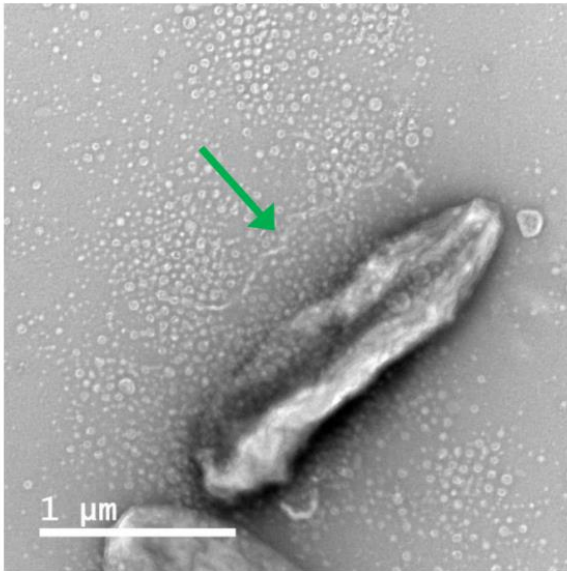

**SB 1.5 % agar**

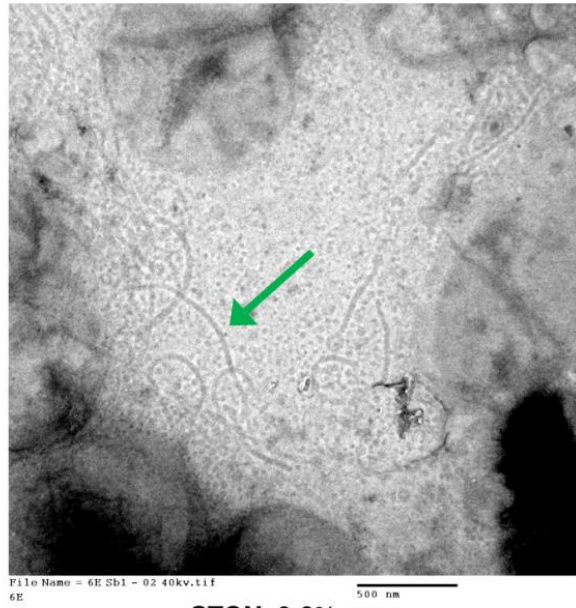

**LB 0.6% agar**

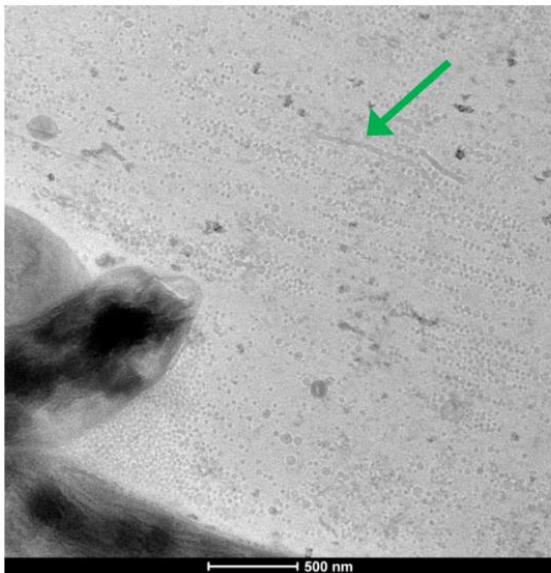

**STON 0.6% agar**

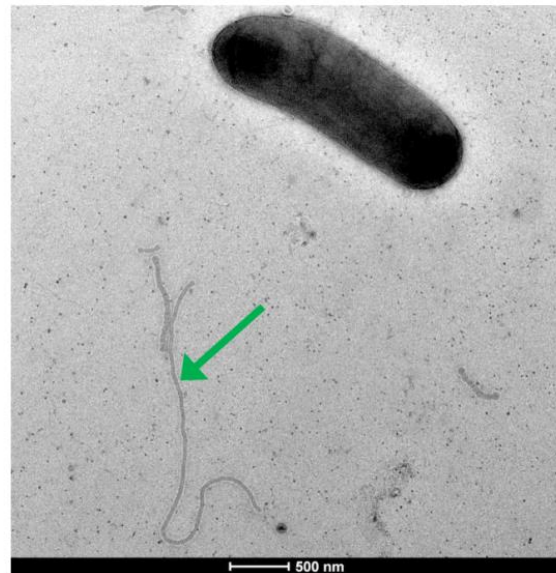

**XVM2 0.6% agar**

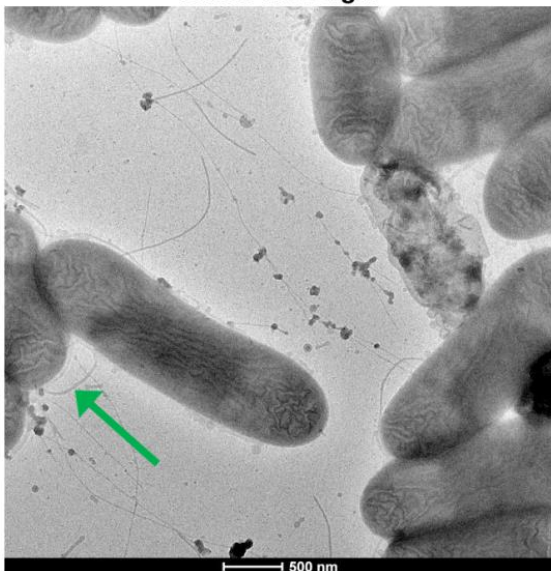

**M9 0.6% agar**

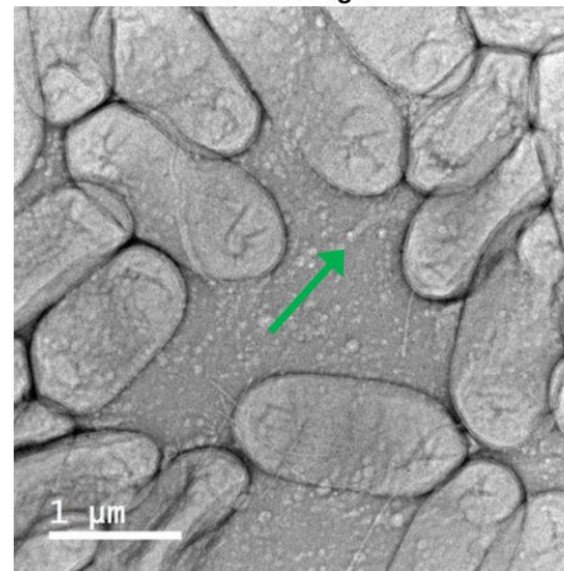



857           **Fig. S1.** Formation of outer membrane tubes by *X. citri* cells in different culture  
858 conditions and media. The tested media include liquid SB, in which the samples were  
859 concentrated by ultracentrifugation before being applied to the TEM grids, SB with 1.5% agar (a  
860 higher concentration than the 0.6% used for Fig. 1), LB with 0.6% agar, STON with 0.6% agar  
861 (Guzzo et al., J Mol Biol, 2009, 10.1016/j.jmb.2009.07.065), XVM2 with 0.6% agar (Wengelnik  
862 et al., J Bacteriol, 1996, 10.1128/jb.178.4.1061-1069.1996), and M9 with 0.6% agar. The green  
863 arrows point to examples of the outer membrane tubes that can be seen in the images.  
864

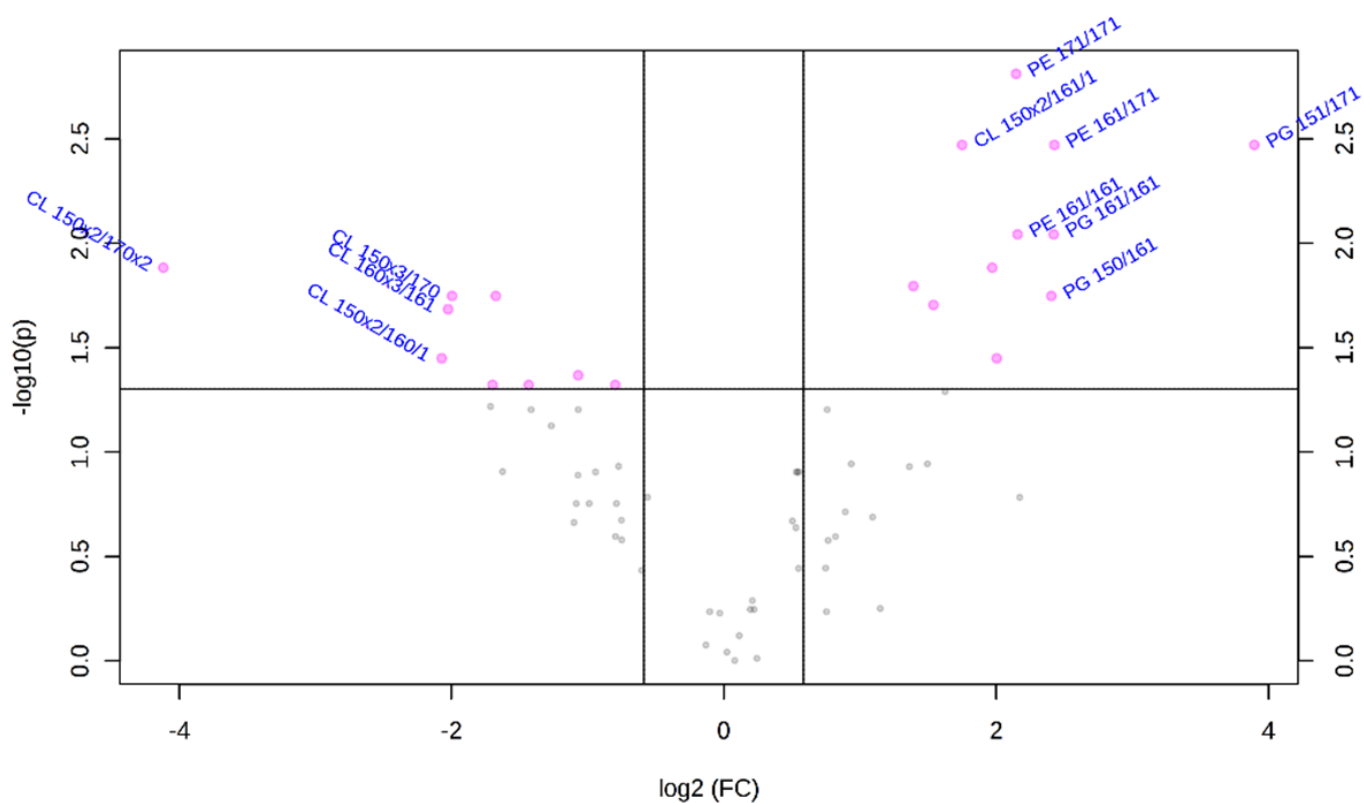

865

866 **Fig. S2.** Volcano plot analysis of the lipidomic data. The 20 most altered lipids between  
867 the OMV and whole cell samples are identified in the plot as the ones presenting fold change  
868 values above 1.5 and  $p < 0.05$ . Statistical significance was evaluated by FDR-adjusted t-test.

869

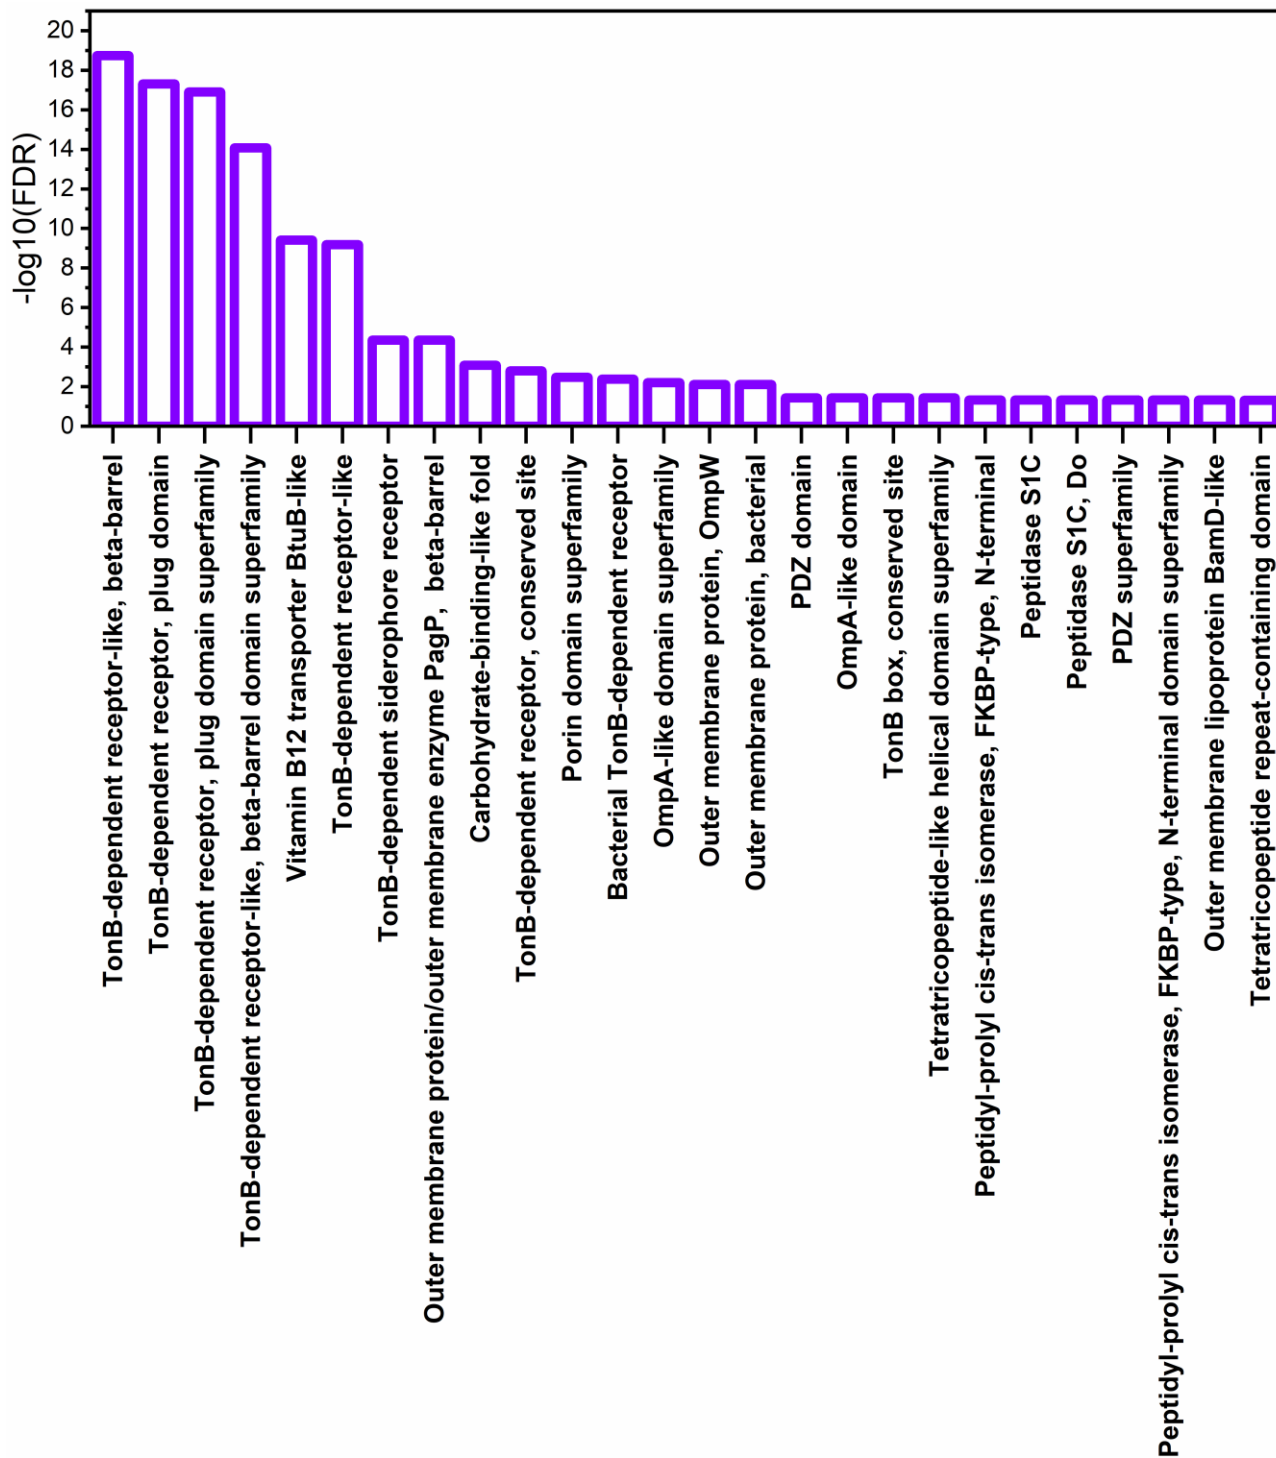

870

871 **Fig. S3.** Most significantly enriched InterPro domains found in the purified OMVs  
 872 compared to the *X. citri* pv. *citri* 306 genome. The lowest false discovery rates (FDR), thus the  
 873 highest  $-\log_{10}(\text{FDR})$  values, were observed for domains related to TonB-dependent receptors.
